# Supplementary material for: High-performance diluted nickel nanoclusters decorating ruthenium nanowires for pH-universal overall water splitting
Source: Royal Society of Chemistry journal article supplement (doi:10.1039/d0ee04028b), 2021-01-01
Supplement: d0ee04028b1.pdf [file d0ee04028b1.pdf]

1 **Supporting information for**

2 **High-Performance Diluted Nickel Nanoclusters Decorating Ruthenium**  
3 **Nanowires for pH-Universal Overall Water Splitting**

4 *Ting Zhu<sup>a,b,#</sup>, Shangheng Liu<sup>a,#</sup>, Bin Huang<sup>b,#</sup>, Qi Shao<sup>a,\*</sup>, Man Wang<sup>c</sup>, Fan Li<sup>d</sup>, Xinyue Tan<sup>a</sup>,*  
5 *Yecan Pi<sup>a</sup>, Shih-Chang Weng<sup>e</sup>, Bolong Huang<sup>f,\*</sup>, Zhiwei Hu<sup>g</sup>, Jianbo Wu<sup>d</sup>, Yong Qian<sup>b</sup>, and*  
6 *Xiaoqing Huang<sup>a,h,\*</sup>*

7

8 <sup>a</sup>T. Zhu, S. Liu, Dr. Q. Shao, X. Tan, Dr. Y. Pi, Prof. X. Huang

9 <sup>a</sup>College of Chemistry, Chemical Engineering and Materials Science, Soochow University,  
10 Jiangsu 215123, P. R. China.

11 <sup>b</sup>T. Zhu, Dr. Bin. Huang, Prof. Y. Qian

12 <sup>b</sup>Jiangxi Province Key Laboratory of Polymer Micro/Nano Manufacturing and Devices, East  
13 China University of Technology, Nanchang, Jiangxi 330013, P. R. China

14 <sup>c</sup>Dr. M. Wang

15 <sup>c</sup>Guangdong Provincial Key Laboratory of Energy Materials for Electric Power, Southern  
16 University of Science and Technology, Shenzhen 518055, P. R. China.

17 <sup>d</sup>F. Li, Prof. J. Wu

18 <sup>d</sup>School of Materials Science and Engineering, Shanghai Jiao Tong University, Shanghai,  
19 200240, P. R. China.

20 <sup>e</sup>Dr. S. Weng

21 <sup>e</sup>National Synchrotron Radiation Research Center, Hsinchu, 30076, Taiwan.

22 <sup>f</sup>Prof. Bolong. Huang

23 <sup>f</sup>Department of Applied Biology and Chemical Technology, The Hong Kong Polytechnic  
24 University, Hung Hom, Kowloon, Hong Kong SAR.

25 <sup>g</sup>Prof. Z. Hu

26 <sup>g</sup>Max-Planck-Institute for Chemical Physics of Solids, Nöthnitzer Street, 4001187, Dresden,  
27 Germany.

28 <sup>h</sup>Prof. X. Huang

29 <sup>h</sup>College of Chemistry and Chemical Engineering, Xiamen University, Xiamen, 361005, P. R.  
30 China.

31 <sup>#</sup>These authors contributed equally.

32 Email: qshao@suda.edu.cn; bhuang@polyu.edu.hk; hxq006@xmu.edu.cn

## 1 **S1. Experimental Section**

### 2 **1.1 Chemicals**

3 Potassium aquapentachloro-ruthenate (III) ( $\text{K}_2\text{RuCl}_5 \cdot \text{H}_2\text{O}$ ) and Nafion were purchased from  
4 Sigma-Aldrich. Polyvinyl pyrrolidone (PVP, MW = 58000, AR) was obtained from J&K  
5 Scientific Ltd. Sodium formate ( $\text{HCOONa}$ ) was purchased from Aladdin-reagent Inc. Nickel  
6 (II) formate dehydrate ( $\text{Ni}(\text{HCOO})_2 \cdot 2\text{H}_2\text{O}$ ) was purchased from Alfa Aesar. Potassium  
7 hydroxide ( $\text{KOH}$ , AR,  $\geq 85\%$ ), ethanol ( $\text{C}_2\text{H}_6\text{O}$ ), isopropanol ( $\text{C}_3\text{H}_8\text{O}$ ), acetone ( $\text{C}_3\text{H}_6\text{O}$ ) and  
8 sulfuric acid ( $\text{H}_2\text{SO}_4$ ) were purchased from Sinopharm Chemical Reagent Co. Ltd. (Shanghai,  
9 China). Vulcan XC-72 R carbon black was purchased from Cabot. Commercial Pt/C (20  
10 wt%) and commercial Ir/C (20 wt%) were purchased from Johnson Matthey (JM) Corporation.  
11 All the chemicals were used as received without further purification. The ultra-pure water (18  
12  $\text{M}\Omega \text{ cm}^{-1}$ , Aqua Solutions) was used in all experiments.

### 13 **1.2 Synthesis of Ni-Ru NWs and Ru NWs**

14 In a typical preparation of Ni-Ru NWs,  $\text{K}_2\text{RuCl}_5 \cdot \text{H}_2\text{O}$  (9.4 mg),  $\text{Ni}(\text{HCOO})_2 \cdot 2\text{H}_2\text{O}$  (4.6 mg),  
15 PVP (40 mg) and  $\text{H}_2\text{O}$  (10 mL) were added into a 20 mL Teflon-lined stainless-steel  
16 autoclave. The mixture was ultrasonicated for around 30 min. The resulting homogeneous  
17 mixture was then heated at 200 °C for 24 h before it cooled down to room temperature. The  
18 resulting colloidal product was collected by centrifugation and washed with a mixture of  
19 ethanol (1 mL) and acetone (8 mL). The preparation of Ru NWs was similar to that of Ni-Ru  
20 NWs except that  $\text{Ni}(\text{HCOO})_2 \cdot 2\text{H}_2\text{O}$  (4.6 mg) was replaced by  $\text{HCOONa}$  (1.7 mg).

### 21 **1.3 Synthesis of $\text{Ni}_{\text{cluster}}$ -Ru NWs**

22 In a typical preparation of  $\text{Ni}_{\text{cluster}}$ -Ru NWs, the Ni-Ru NWs were transferred into nitrogen-  
23 saturated 0.5 M  $\text{H}_2\text{SO}_4$ . The NWs was magnetically stirred under 500  $\text{r s}^{-1}$  for 12 hours to  
24 remove the Ni species on the surface. The resulting products were collected by centrifugation  
25 and washed by water with several times.

### 26 **1.4 Preparations of supported catalysts**

1 To prepare the catalysts, nanowires were loaded on carbon powder (VXC-72, Carbot) in 10  
2 mL ethanol and sonicated for 0.5 h to deposit NWs on carbon. The products were separated  
3 by centrifugation and washed with ethanol/acetone three times, and finally kept in the vacuum  
4 drying oven under 60 °C for 12 h. And then annealed in air at 250 °C for 1 h.

### 5 **1.5 Characterization**

6 The samples were prepared by dropping cyclohexane or ethanol dispersion of samples onto  
7 carbon-coated copper TEM grids using pipettes and dried under ambient conditions. Low-  
8 magnification transmission electron microscopy (TEM) was conducted on a HITACHI  
9 HT7700 transmission electron microscope at an accelerating voltage of 120 kV. Atomic  
10 resolution aberration-corrected HAADF-STEM was conducted on JEM-ARM300F Grand  
11 ARM Transmission Electron Microscope. Powder X-ray Diffraction (PXRD) pattern was  
12 collected on X'Pert-Pro MPD diffractometer (Netherlands PANalytical) with a Cu K $\alpha$  X-ray  
13 source ( $\lambda = 1.540598 \text{ \AA}$ ). XAS data were collected at the TLS-07A beamline of the National  
14 Synchrotron Radiation Research Center (NSRRC, Hsinchu, Taiwan). The EXAFS data were  
15 processed according to the standard procedures using the ATHENA module implemented in  
16 the “IFEFFIT software packages” in the method section of the revised manuscript.<sup>1</sup> The  
17 concentration of catalysts was determined by the inductively coupled plasma optical emission  
18 spectrometer (Varian 710-ES). X-ray photoelectron spectra (XPS) was collected with an SSI  
19 S-Probe XPS Spectrometer. TGA was performed on SII TG/DTA 6300 thermogravimetric  
20 analyzer over a temperature range of 25-900 °C at a heating rate of 10 °C min<sup>-1</sup> in oxygen  
21 atmosphere. ICP-OES was performed on Agilent 5110. The hydrogen was analyzed by gas  
22 chromatography (GC 9860). Other characterizations were collected by the same instruments  
23 mentioned in our previous studies.<sup>2-4</sup>

### 24 **1.6 Electrochemical measurements**

25 For all the electrochemical tests, a three-electrode system was used to conduct the  
26 electrochemical measurements at an electrochemical workstation (CHI 660E). The catalyst

1 (2.0 mg) was dispersed in 390  $\mu\text{L}$  water-ethanol solution (3:1, v/v) with 10  $\mu\text{L}$  5 wt% Nafion  
2 by syndicating for 1 h to form a homogeneous ink. The working electrode was fabricated by  
3 casting 10  $\mu\text{L}$  catalyst ink onto a glassy carbon electrode (GCE) (diameter: 5 mm, area: 0.196  
4  $\text{cm}^2$ ). The mass loading of the catalyst was 0.25  $\text{mg cm}^{-2}$ . A graphite rod and a saturated  
5 calomel electrode (SCE) were used as the counter electrode and reference electrode,  
6 respectively. The reference was calibrated with respect to the reversible hydrogen electrode  
7 (RHE). Linear sweep voltammetry (LSV) was carried out at 5  $\text{mV s}^{-1}$  at room temperature.  
8 The electrochemical active surface area (ECSA) was determined by electrochemical double-  
9 layer capacitance ( $C_{dl}$ ) measurements on cyclic voltammetry (CV) at room temperature from  
10 20  $\text{mV s}^{-1}$  to 200  $\text{mV s}^{-1}$ . Electrochemical impedance spectroscopy (EIS) was collected at the  
11 overpotential of 10 mV with the frequency range from 0.01 to 100 kHz. For comparison, the  
12 commercial Pt/C was examined in all tests under the same conditions.

### 13 **1.7 Computational details**

14 The simplified rotationally invariant DFT+U calculations within CASTEP code have been  
15 selected to investigate the electronic and energetic properties.<sup>5, 6</sup> We choose the algorithm of  
16 Broyden-Fletcher-Goldfarb-Shannon (BFGS) for all the ground state geometry optimization  
17 in this work. The PBE exchange-correlation functional is selected for DFT+U calculations. To  
18 improve the convergence quality of the transition metal systems for  $\text{Ni}_{\text{cluster}}\text{-Ru}$ , the ensemble  
19 DFT (EDFT) by Marzari et al. has been applied during electronic-minimization process.<sup>7</sup> The  
20 cutoff energy of plane-wave basis sets for total energy calculations has been set to 750 eV.  
21 The substrate Ru-surface model was built based on the bulk hcp-Ru crystal, where the surface  
22 system has been built with 10-layer thickness. The surface Ni cluster has been constructed  
23 from the unit cell of fcc-Ni with a size of 15 atoms and anchored on the Ru surfaces. To  
24 ensure sufficient space for all the geometry optimization and adsorption of intermediates, we  
25 set the vacuum space of 15  $\text{\AA}$  along the z-axis. Considering the DFT computational cost, the  
26 Monkhost-Pack reciprocal space integration was performed using Gamma-center-off special

1 k-points with a mesh of  $2 \times 2 \times 2$ , which was guided by the initial convergence test.<sup>8</sup> The overall  
2 total convergence settings have been set that the total energy for each step should be less than  
3  $5.0 \times 10^{-7}$  eV per atom while the Hellmann-Feynman forces on the atom should not exceed  
4  $0.001$  eV/Å.

5 Through the OPIUM code in the Kleinman-Bylander projector form, the norm-conserving  
6 pseudopotentials of Ru, Ni, O, and H are generated.<sup>9</sup> Meanwhile, to treat the mixed valence  
7 Ru and Ni spin-orbital coupling effect, the non-linear partial core correction and a scalar  
8 relativistic averaging scheme are applied.<sup>10, 11</sup> The projector-based (4d, 5s, 5p), (3d, 4s, 4p),  
9 (2s, 2p), and (1s) states have been chosen to reflect the valence states of Ru, Ni, O, and H  
10 atoms, respectively. The RRKJ method is chosen for the optimization of the  
11 pseudopotentials.<sup>12</sup>

## 12 **1.8 Active Sites Calculations**

13 The number of active sites (n) can be qualified based on the underpotential deposition (UPD)  
14 copper stripping charge ( $Q_{Cu}$ ,  $Cu_{UPD} \rightarrow Cu^{2+} + 2e^-$ ) with the following formula:

$$15 \quad n = Q_{Cu} / 2F,$$

16 where F is the Faraday constant ( $C \text{ mol}^{-1}$ ).<sup>13</sup>

## 17 **1.9 Turnover Frequency (TOF) Calculations**

18 TOF was calculated using the following formula:

$$19 \quad TOF = I / (2Fn),$$

20 where I is the current (A) during the linear sweep measurement, F is the Faraday constant ( $C$   
21  $\text{mol}^{-1}$ ), n is the active sites ( $\text{mol}$ ).<sup>13</sup>

22

1 S2. Figures:

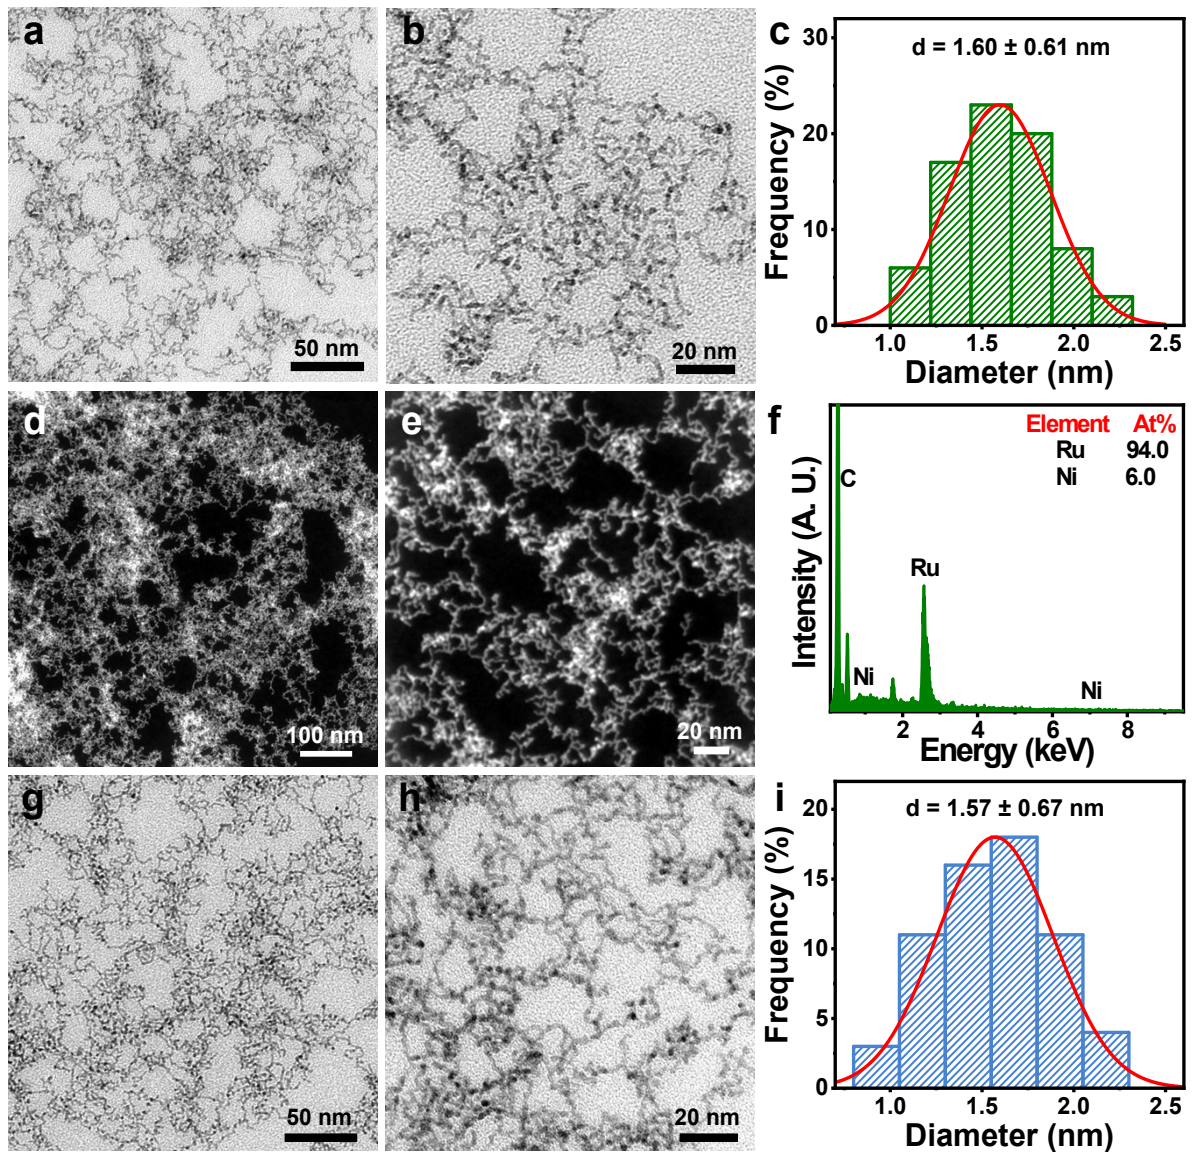

2

3 **Fig. S1.** (a, b) TEM images, (c) corresponding diameter histogram, (d, e) HAADF-STEM  
 4 images and (f) EDS analysis of Ni<sub>cluster</sub>-Ru NWs. (g, h) TEM images, (i) corresponding  
 5 diameter histogram of Ru NWs.

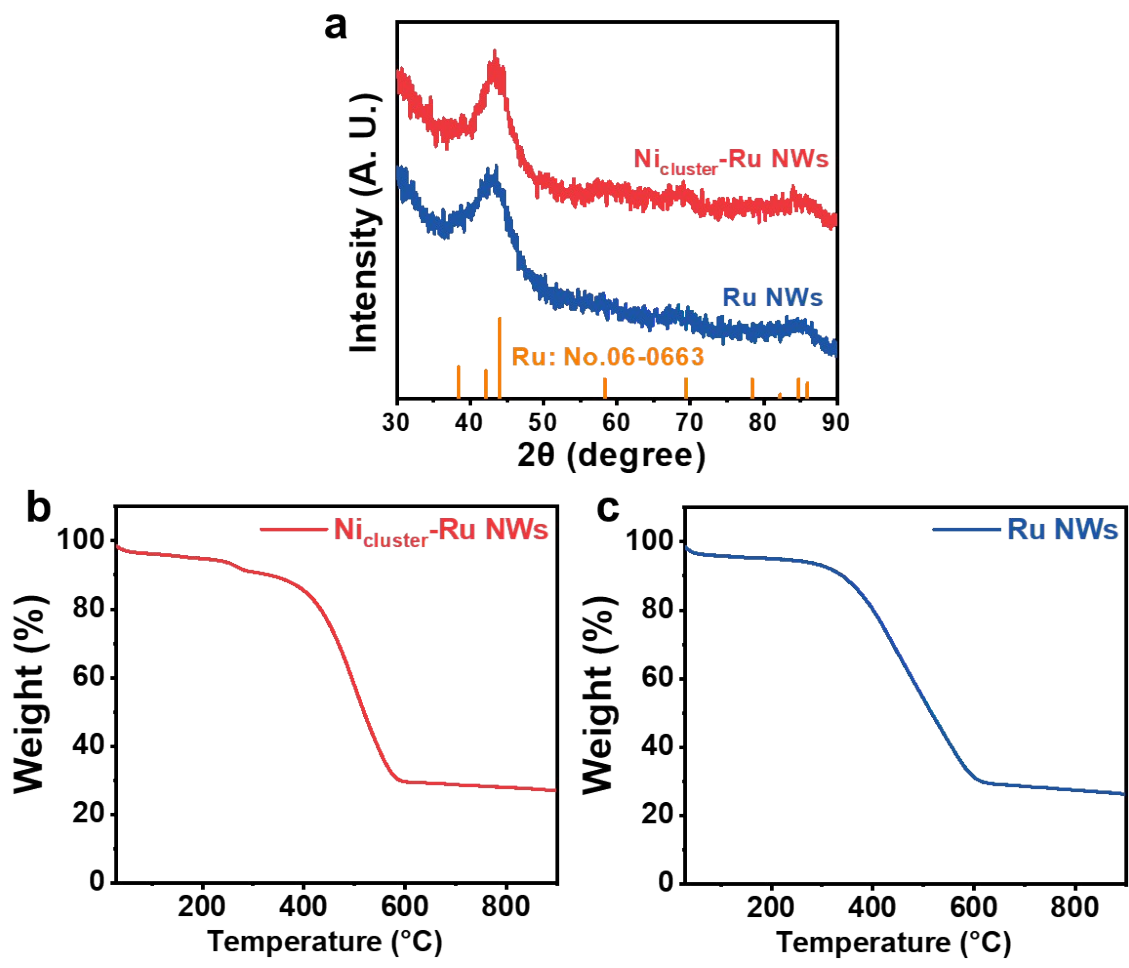

1

2 **Fig. S2.** (a) XRD patterns of Ni<sub>cluster</sub>-Ru NWs and Ru NWs. TGA curves of (b) Ni<sub>cluster</sub>-Ru  
3 NWs and (c) Ru NWs.

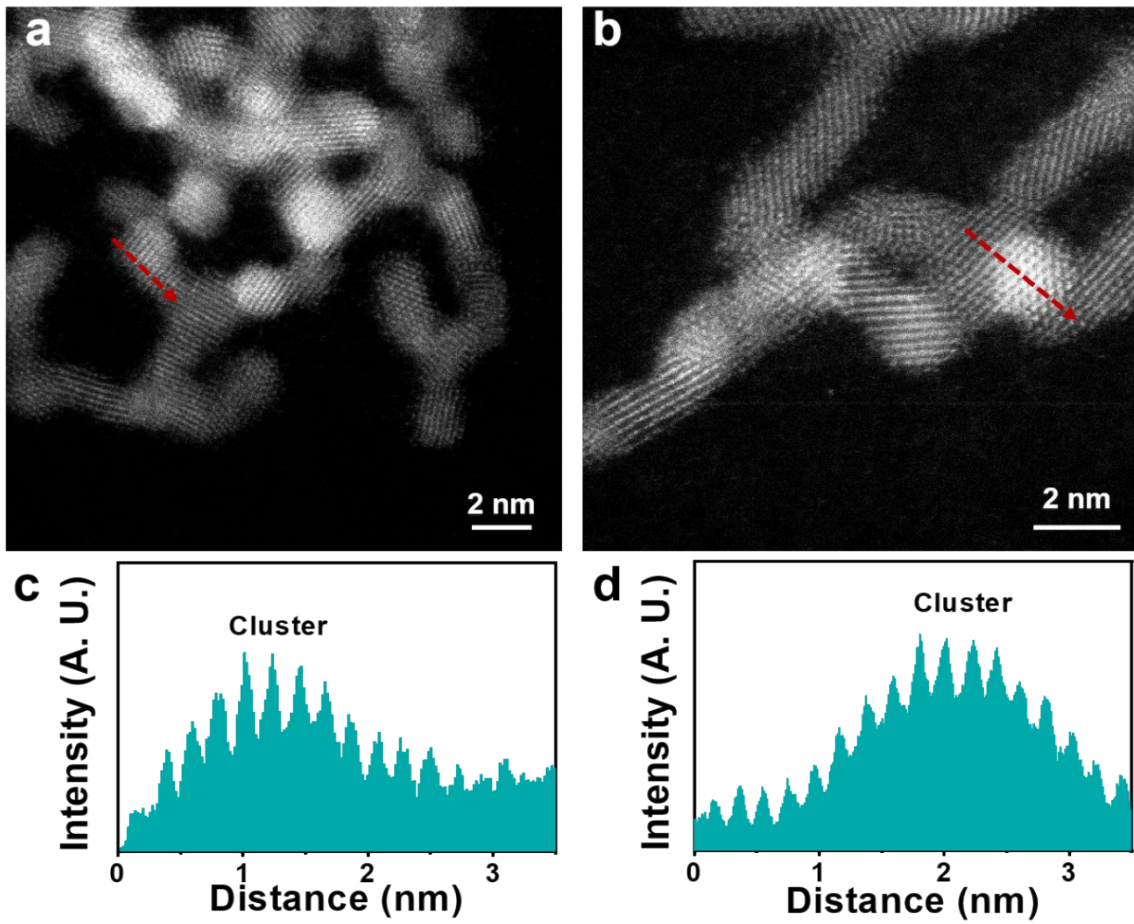

1

2 **Fig. S3.** (a, b) HRTEM images and (c, d) corresponding line scanning profiles  $\text{Ni}_{\text{cluster-Ru}}$   
 3 NWs.



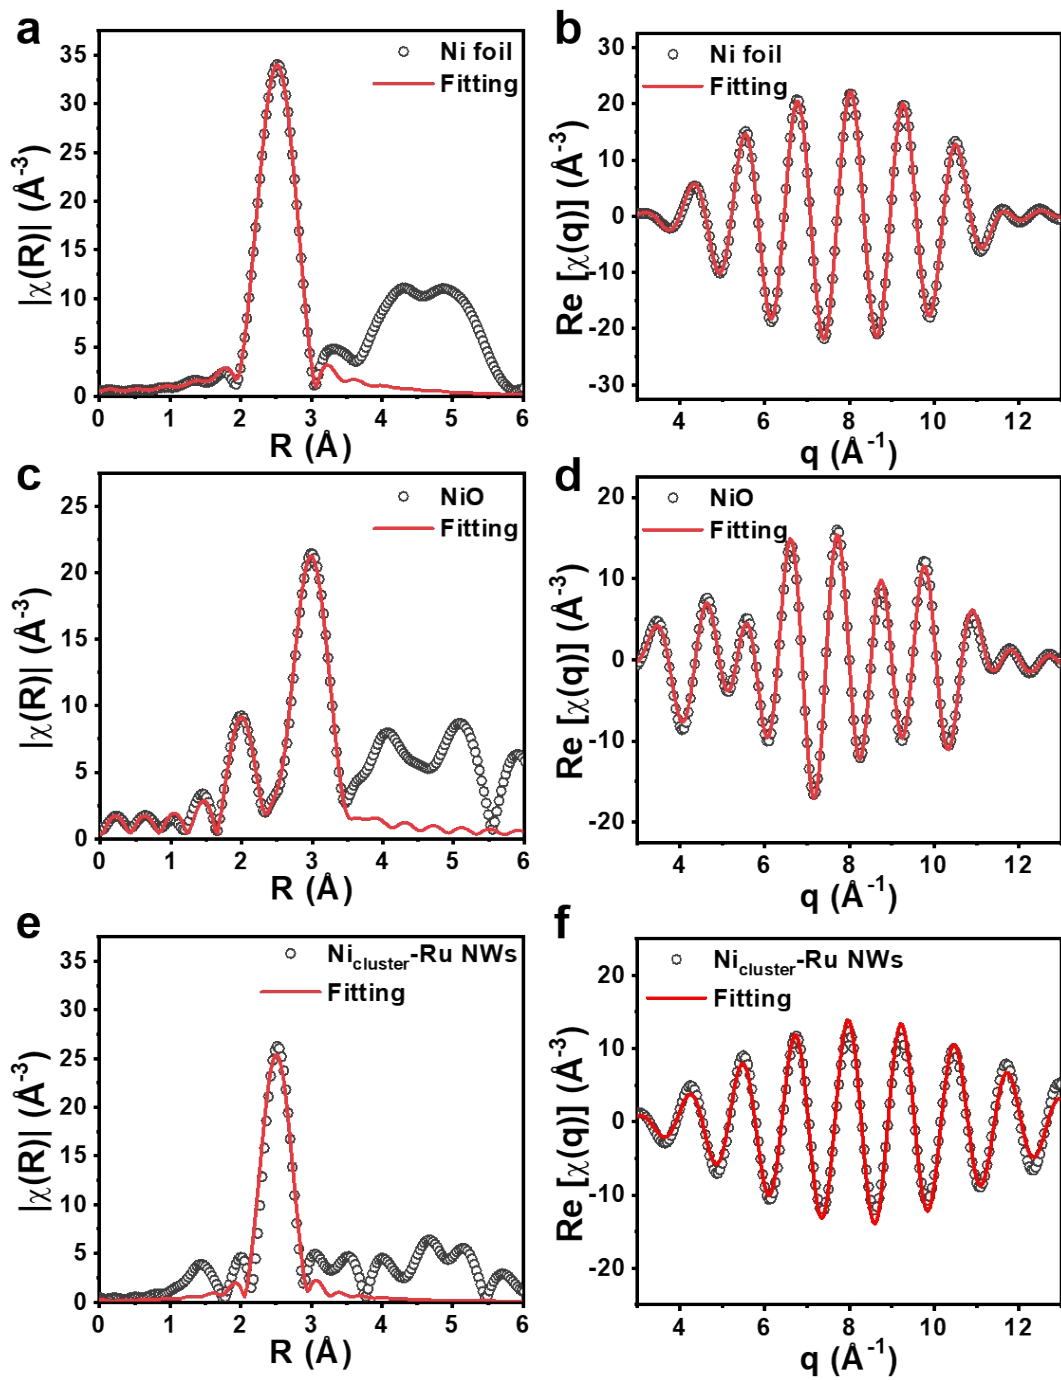

1

2 **Fig. S4.** (a, c, e) R space and (b, d, f) inverse FT-EXAFS fitting results of Ni K-edge for (a,  
 3 b) Ni foil, (c, d) NiO and (e, f) Ni<sub>cluster</sub>-Ru NWs.

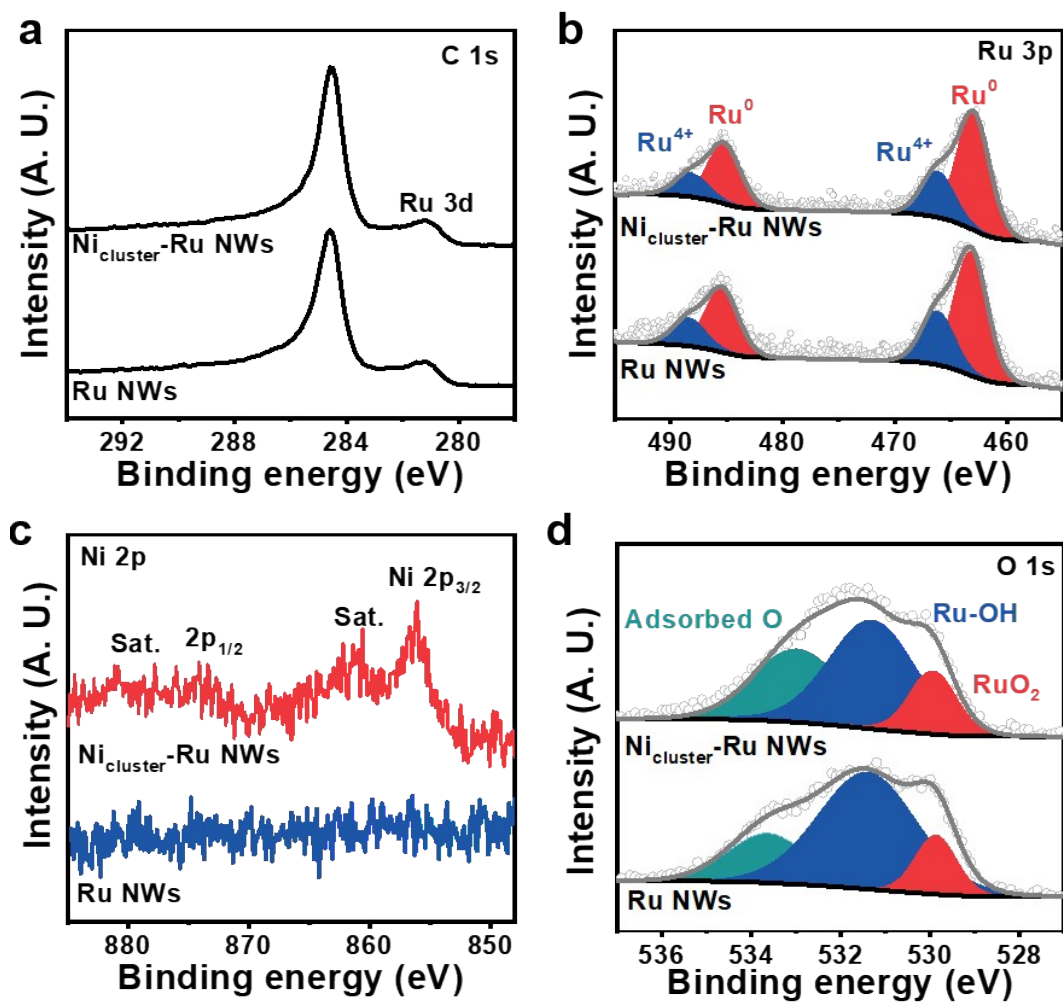

1

2 **Fig. S5.** (a) C 1s, (b) Ru 3p, (c) Ni 2p and (d) O 1s XPS spectra of  $\text{Ni}_{\text{cluster}}\text{-Ru NWs}$  and Ru  
 3 NWs.

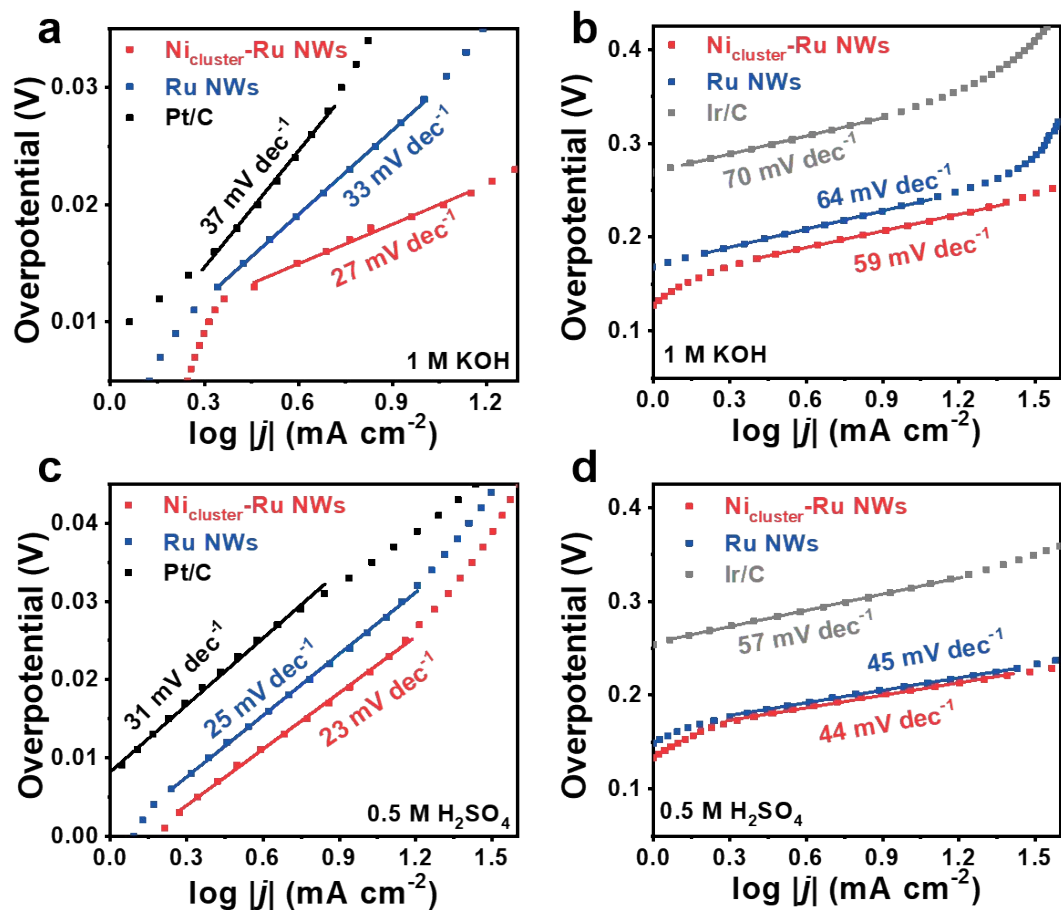

1

2 **Fig. S6.** Tafel slopes for (a, c) HER and (b, d) OER of  $\text{Ni}_{\text{cluster}}\text{-Ru NWs}$ , Ru NWs, Pt/C and  
 3 Ir/C in (a, b) 1 M KOH and (c, d) 0.5 M  $\text{H}_2\text{SO}_4$ , respectively.

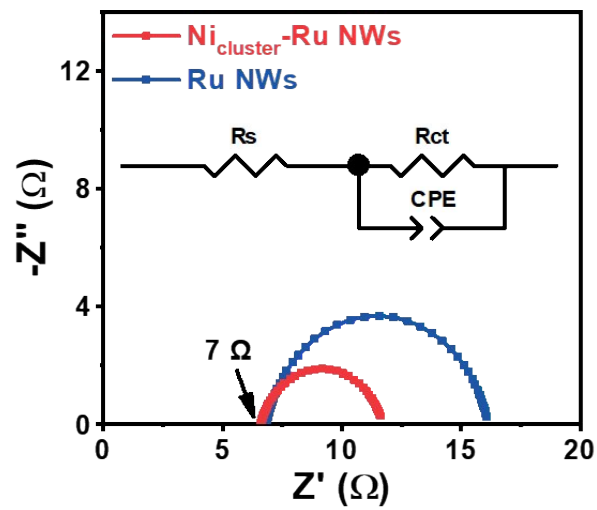

1

2 **Fig. S7.** EIS curves of  $\text{Ni}_{\text{cluster}}\text{-Ru NWs}$  and  $\text{Ru NWs}$  for HER in 1 M KOH.

1

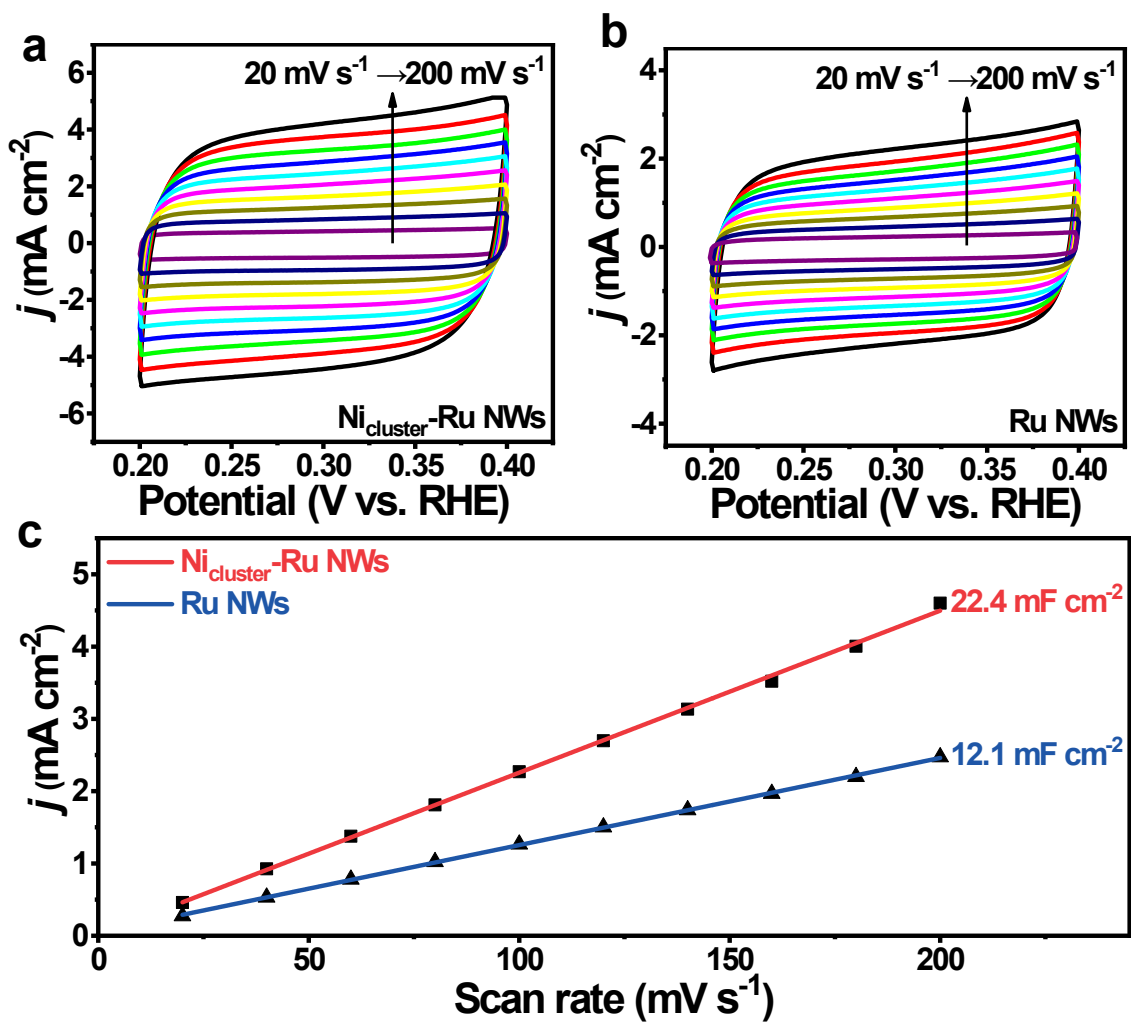

2

3 **Fig. S8.** (a, b) Cyclic voltammogram curves and (c) their corresponding plots of the charging  
 4 current density against scan rates of (a)  $\text{Ni}_{\text{cluster}}\text{-Ru NWs}$  and (b)  $\text{Ru NWs}$  in a potential region  
 5 of 0.2 ~ 0.4 V vs. RHE.

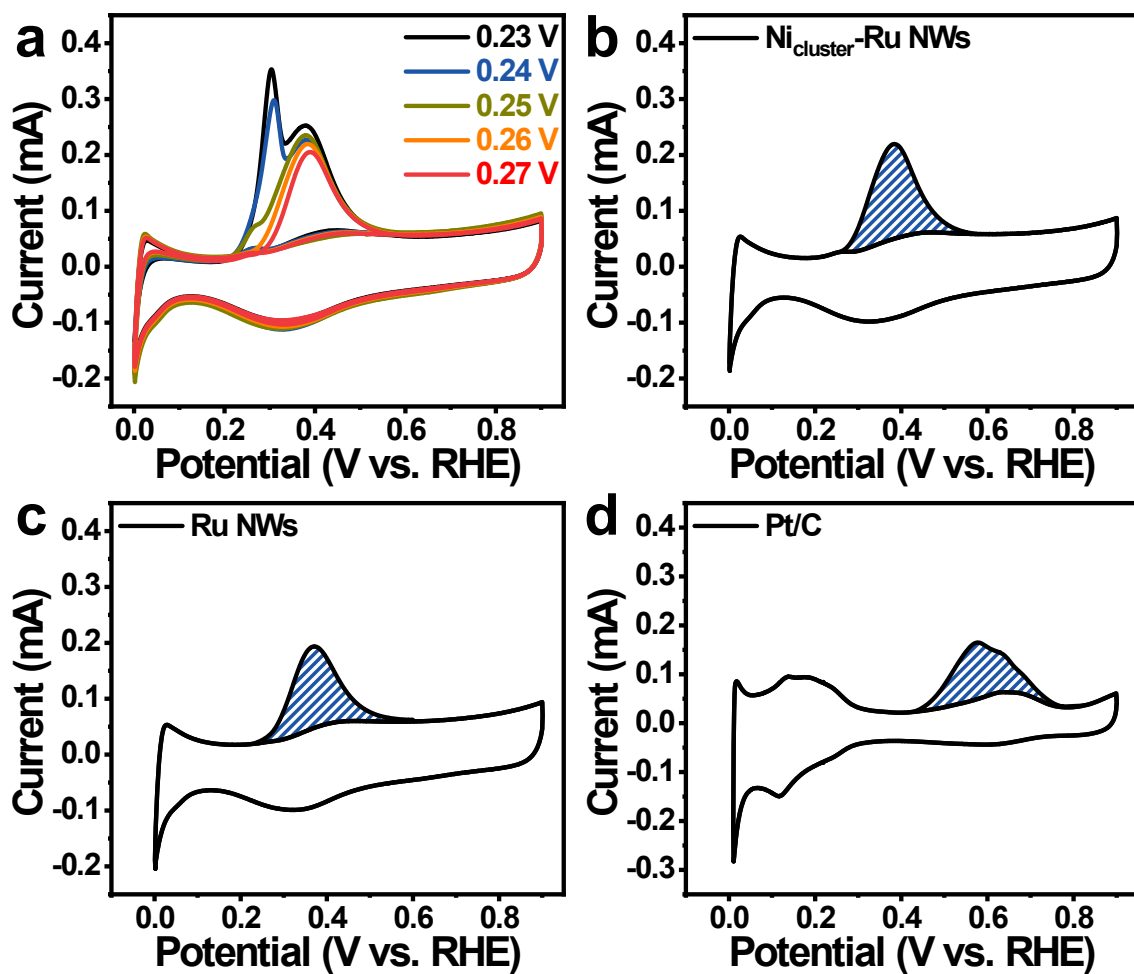

1

2 **Fig. S9.** (a) Copper UPD in 0.5 M H<sub>2</sub>SO<sub>4</sub> + 5 mM CuSO<sub>4</sub> on Ni<sub>cluster</sub>-Ru NWs polarized from  
 3 0.23 V - 0.27 V (vs. RHE) to form the UPD layers. Copper UPD in 0.5 M H<sub>2</sub>SO<sub>4</sub> + 5 mM  
 4 CuSO<sub>4</sub> on (b) Ni<sub>cluster</sub>-Ru NWs, (c) Ru NWs and (d) Pt/C. The electrodes were polarized at  
 5 0.26 V (vs. RHE) for 100 s to form the UPD layer.

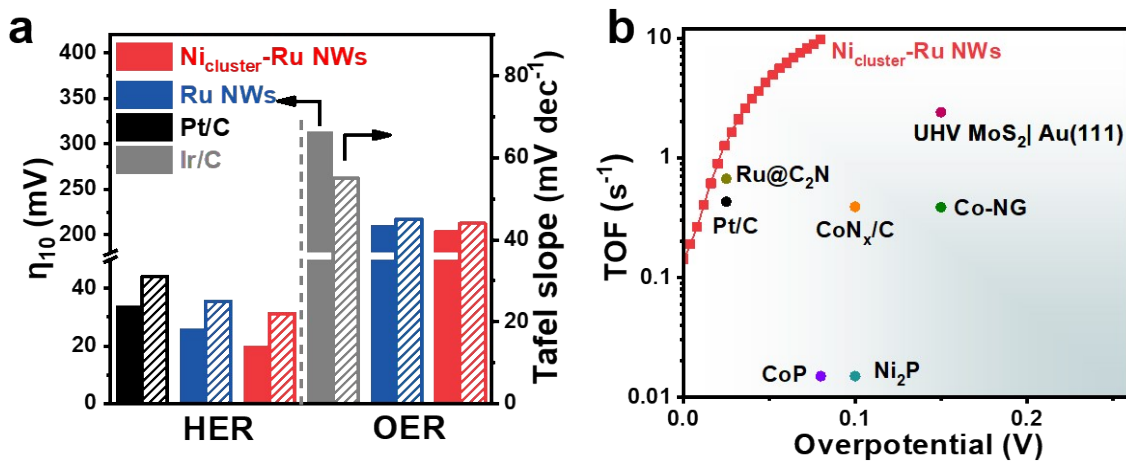

1

2 **Fig. S10.** (a) Overpotentials at 10 mA cm<sup>-2</sup> and Tafel plots of Ni<sub>cluster</sub>-Ru NWs, Ru NWs, Pt/C  
 3 and Ir/C in 0.5 M H<sub>2</sub>SO<sub>4</sub>. (b) TOF values of Ni<sub>cluster</sub>-Ru NWs, Ru NWs, Pt/C and previously  
 4 reported catalysts for HER in 0.5 M H<sub>2</sub>SO<sub>4</sub>.

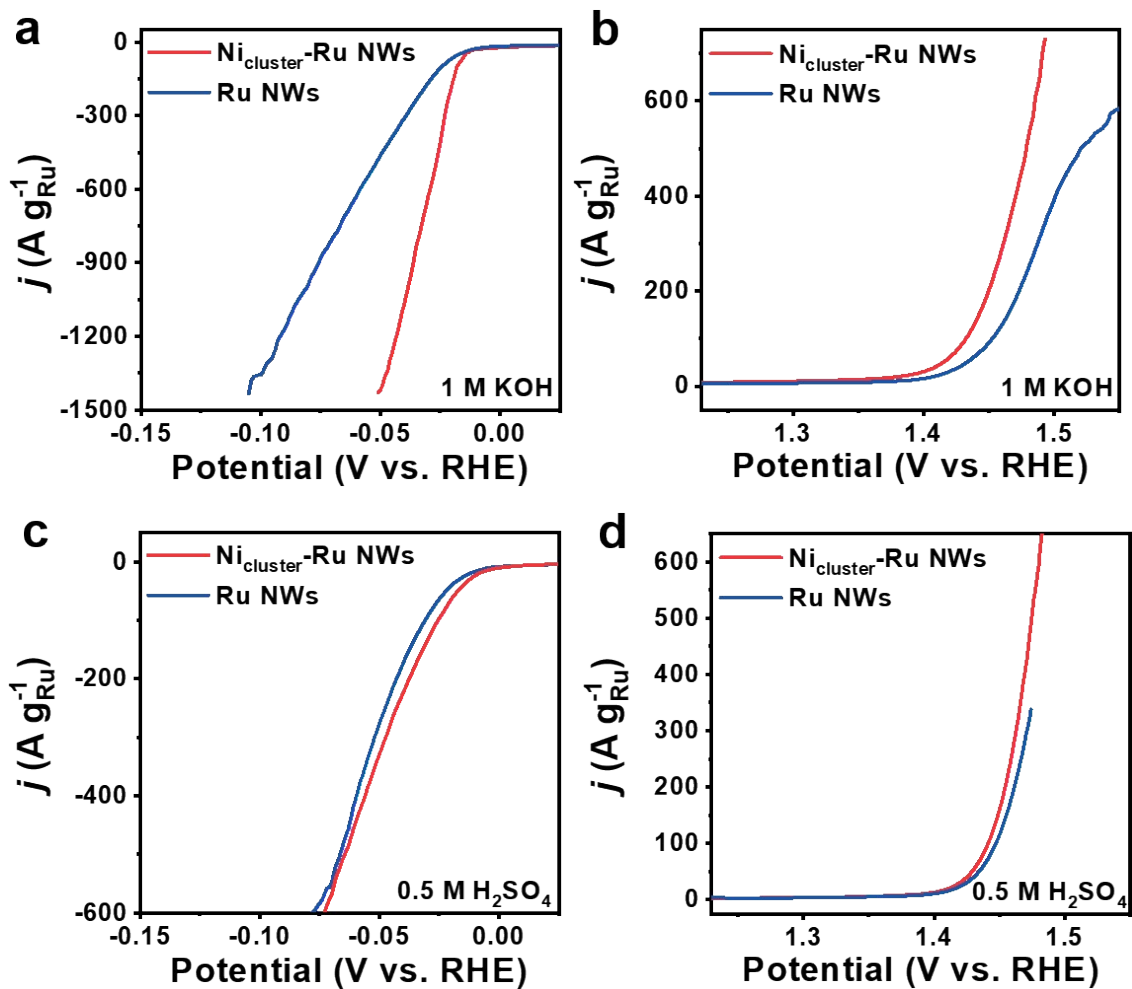

1

2 **Fig. S11.** Ru mass normalized (a, c) HER and (b, d) OER polarization curves of  $\text{Ni}_{\text{cluster}}\text{-Ru}$   
 3 NWs and Ru NWs in (a, b) 1 M KOH and (c, d) 0.5 M  $\text{H}_2\text{SO}_4$ .



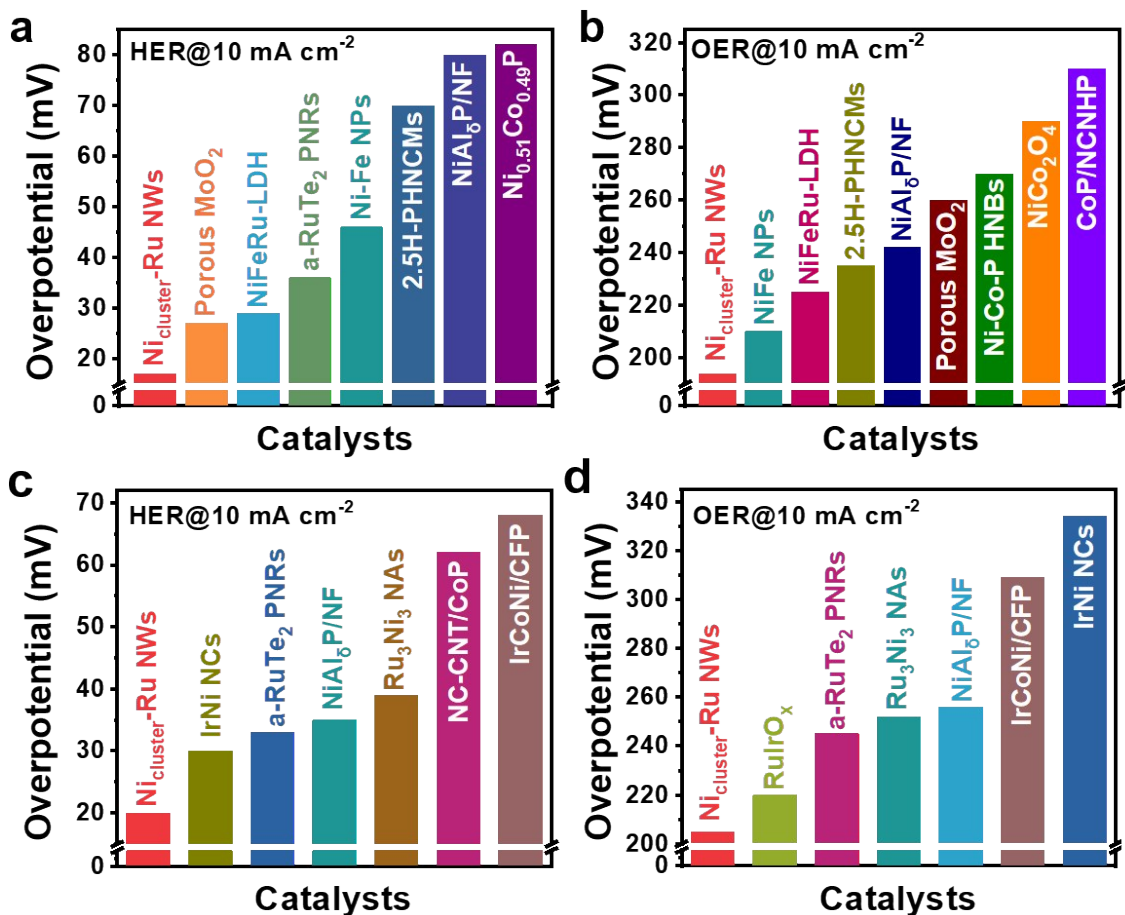

1

2 **Fig. S12.** Comparison of the overpotentials at 10 mA cm<sup>-2</sup> among Ni<sub>cluster</sub>-Ru NWs and  
 3 available reported catalysts towards (a, c) HER and (b, d) OER in (a, b) 1 M KOH and (c, d)  
 4 0.5 M H<sub>2</sub>SO<sub>4</sub>, respectively (Table S4).

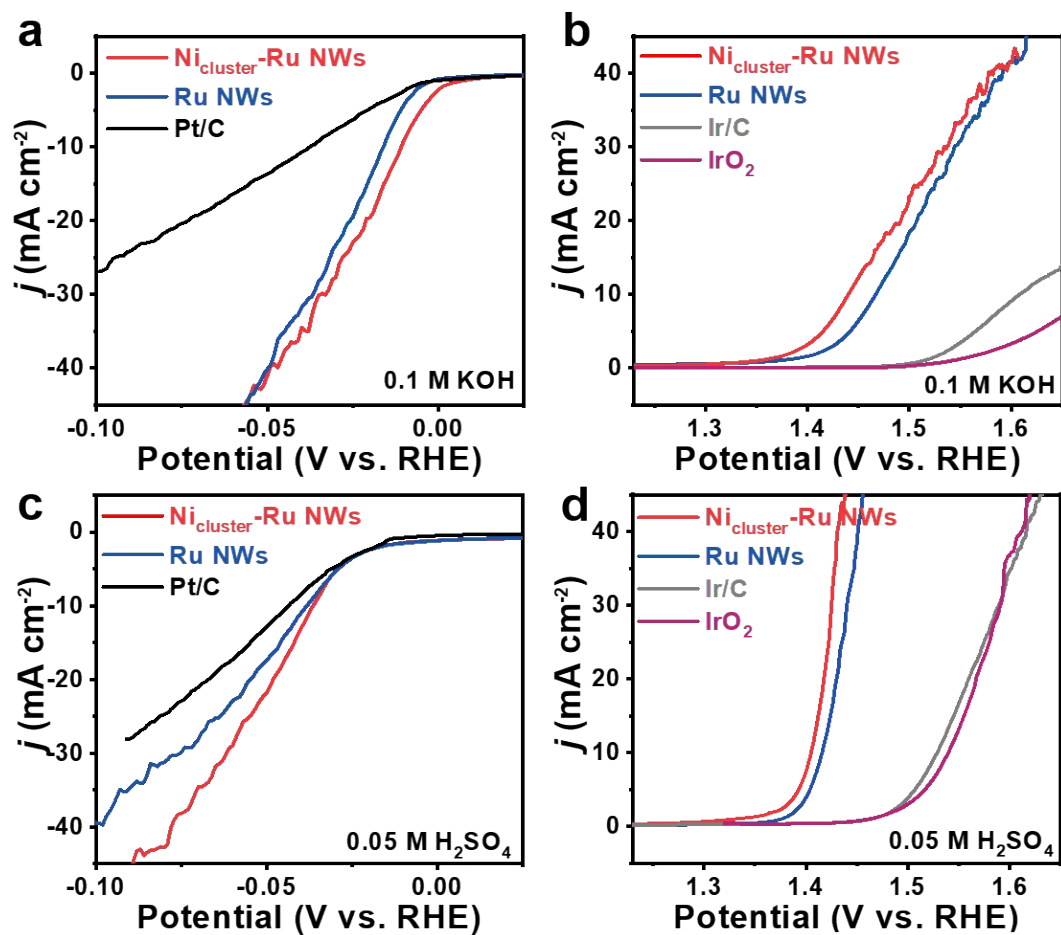

1

2 **Fig. S13.** Polarization curves for (a, c) HER and (b, d) OER of Ni<sub>cluster</sub>-Ru NWs, Ru NWs,  
 3 Ir/C, IrO<sub>2</sub> and Pt/C in (a, b) 0.1 M KOH and (c, d) 0.05 M H<sub>2</sub>SO<sub>4</sub>.

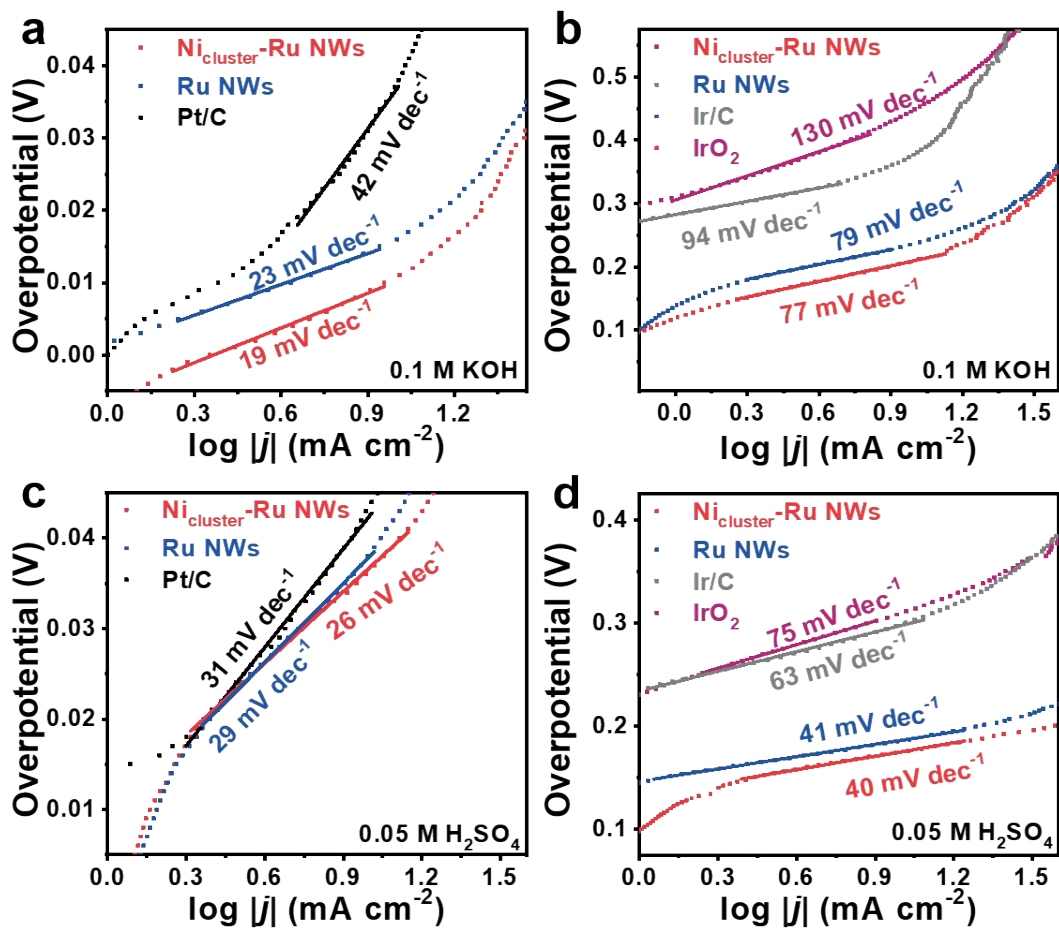

1

2 **Fig. S14.** Tafel slopes for (a, c) HER and (b, d) OER of Ni<sub>cluster</sub>-Ru NWs, Ru NWs, Ir/C, IrO<sub>2</sub>  
 3 and Pt/C in (a, b) 0.1 M KOH and (c, d) 0.05 M H<sub>2</sub>SO<sub>4</sub>.

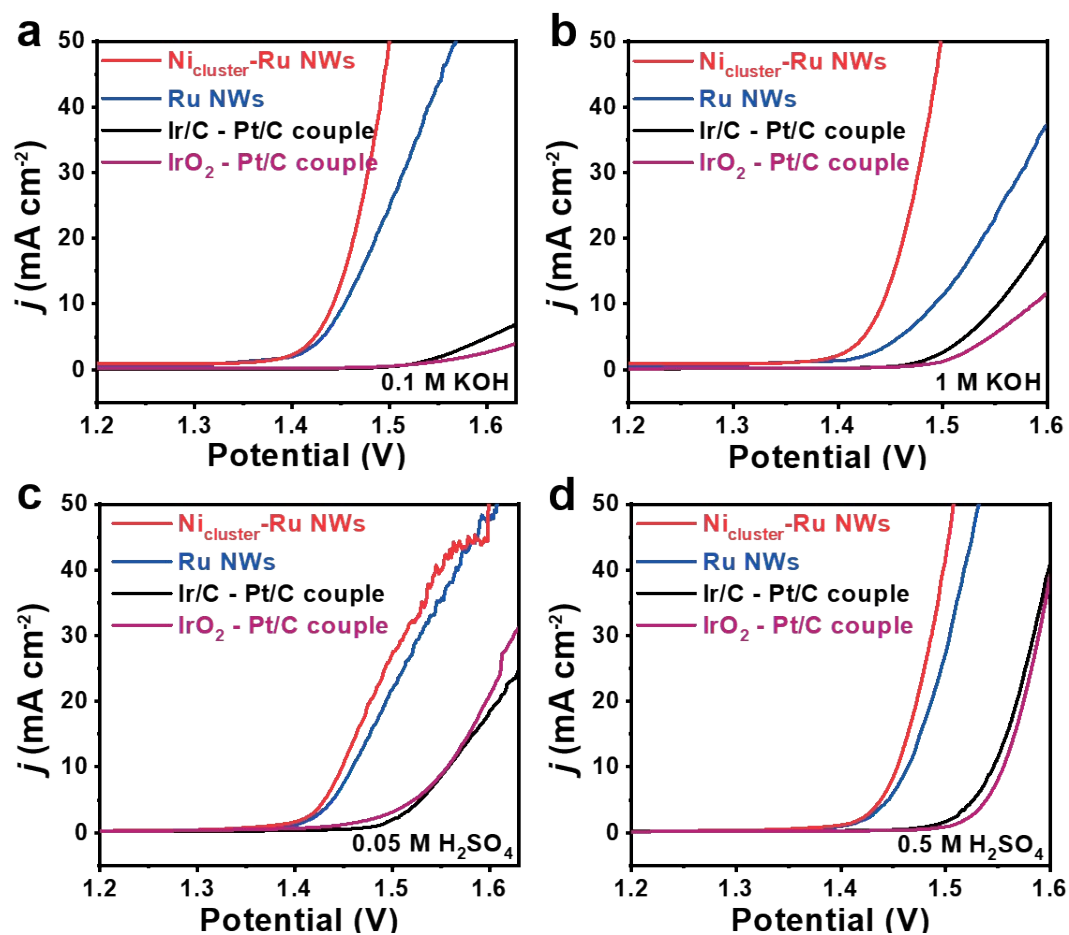

1

2 **Fig. S15.** Polarization curves for overall water splitting of Ni<sub>cluster</sub>-Ru NWs, Ru NWs, Ir/C-  
 3 Pt/C couple and IrO<sub>2</sub>-Pt/C couple in (a) 0.1 M KOH, (b) 1 M KOH, (c) 0.05 M H<sub>2</sub>SO<sub>4</sub> and (d)  
 4 0.5 M H<sub>2</sub>SO<sub>4</sub>.

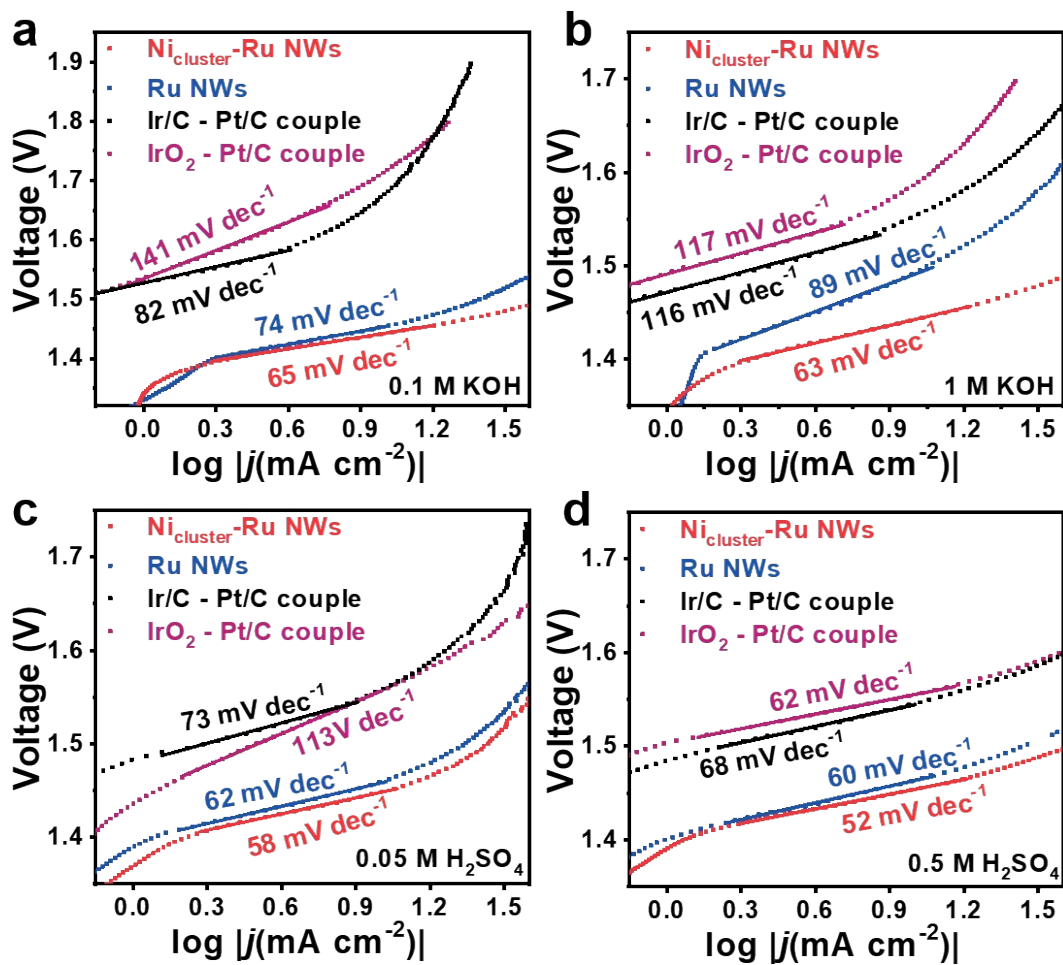

1

2 **Fig. S16.** Tafel slopes for overall water splitting of  $\text{Ni}_{\text{cluster}}\text{-Ru NWs}$ ,  $\text{Ru NWs}$ ,  $\text{Ir/C-Pt/C}$   
 3 couple and  $\text{IrO}_2\text{-Pt/C}$  couple in (a) 0.1 M KOH, (b) 1 M KOH, (c) 0.05 M  $\text{H}_2\text{SO}_4$  and (d) 0.5  
 4 M  $\text{H}_2\text{SO}_4$ .

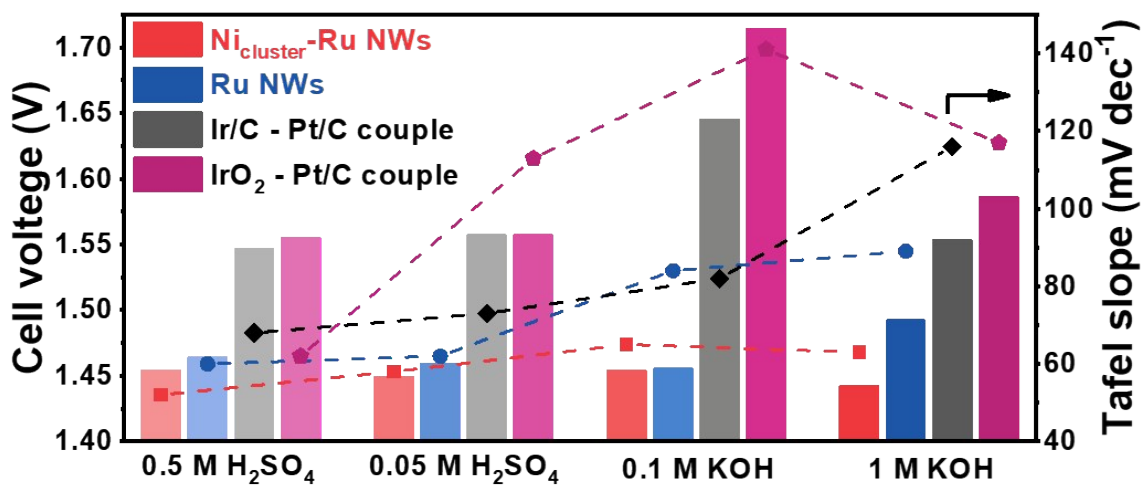

1

2 **Fig. S17.** The cell voltages at 10 mA cm<sup>-2</sup> and Tafel plots of Ni<sub>cluster</sub>-Ru NWs, Ru NWs, Ir/C-  
 3 Pt/C couple and IrO<sub>2</sub>-Pt/C couple of overall water splitting under different pH conditions.

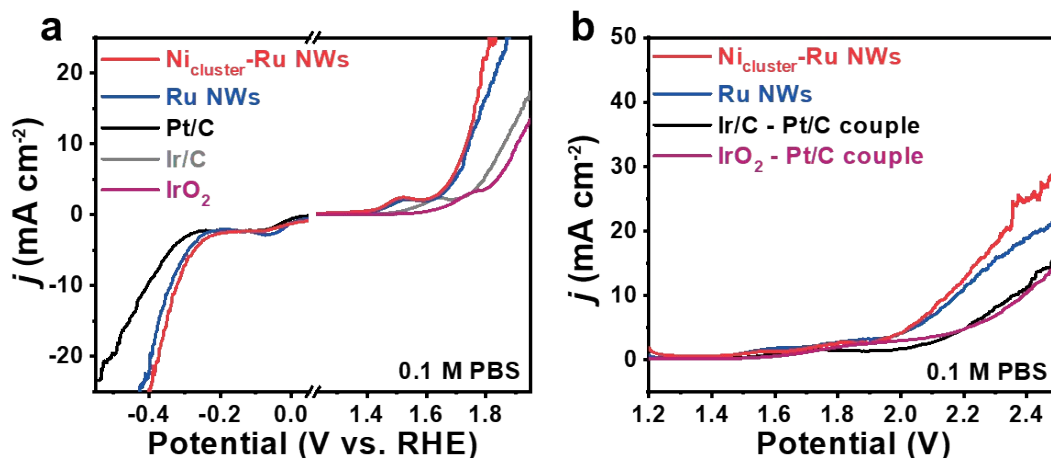

1

2 **Fig. S18.** (a) HER and OER polarization curves of  $\text{Ni}_{\text{cluster}}\text{-Ru NWs}$ , Ru NWs, Pt/C, Ir/C and  
 3  $\text{IrO}_2$  in 0.1 M PBS. (b) Polarization curves for overall water splitting of  $\text{Ni}_{\text{cluster}}\text{-Ru NWs}$ , Ru  
 4 NWs, Ir/C-Pt/C couple and  $\text{IrO}_2\text{-Pt/C couple}$  in 0.1 M PBS.

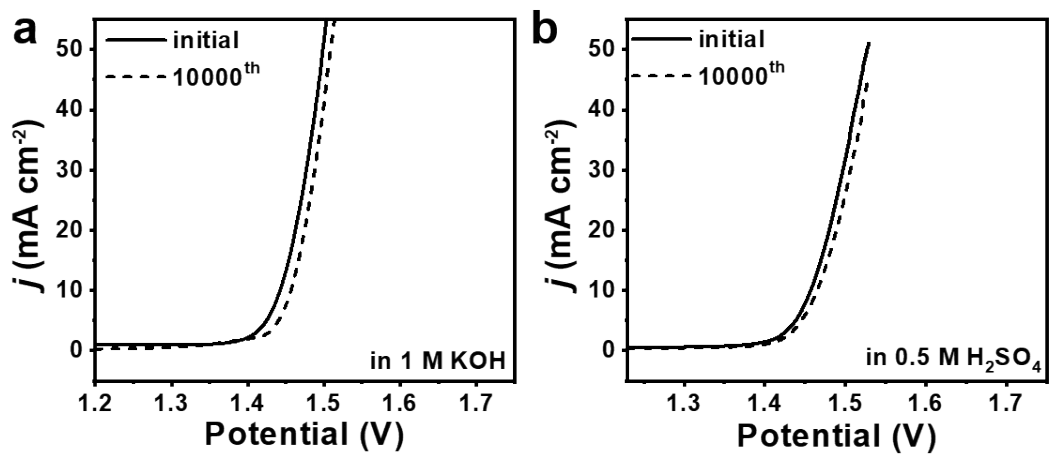

1

2 **Fig. S19.** The polarization curves of Ni<sub>cluster</sub>-Ru NWs measured before and after different  
 3 cycles in (a) 1 M KOH and (b) 0.5 M H<sub>2</sub>SO<sub>4</sub>, respectively (CV scan range from 1.23 V to 1.6  
 4 V).



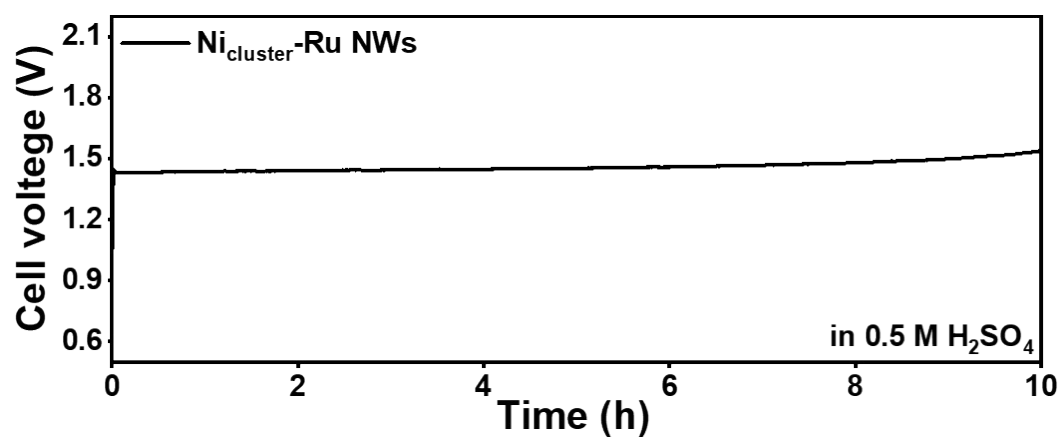

1

2 **Fig. S20.** Chronopotentiometry curve of Ni<sub>cluster</sub>-Ru NWs in 0.5 M H<sub>2</sub>SO<sub>2</sub> at 5 mA cm<sup>-2</sup>.

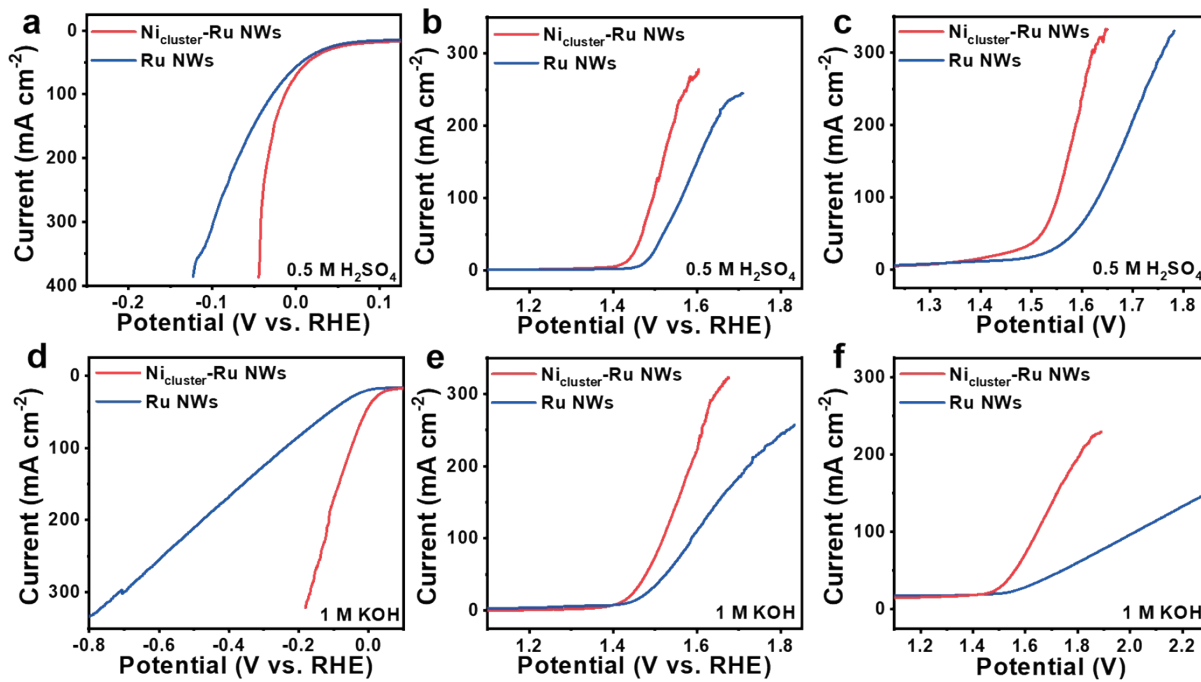

1

2 **Fig. S21.** Polarization curves of Ni<sub>cluster</sub>-Ru NWs and Ru NWs loading on carbon paper (1  
3 cm<sup>2</sup>) for (a, d) HER, (b, e) OER and (c, f) overall water splitting of Ni<sub>cluster</sub>-Ru NWs in (a, b,  
4 c) 0.5 M H<sub>2</sub>SO<sub>4</sub> and (d, e, f) 1 M KOH.

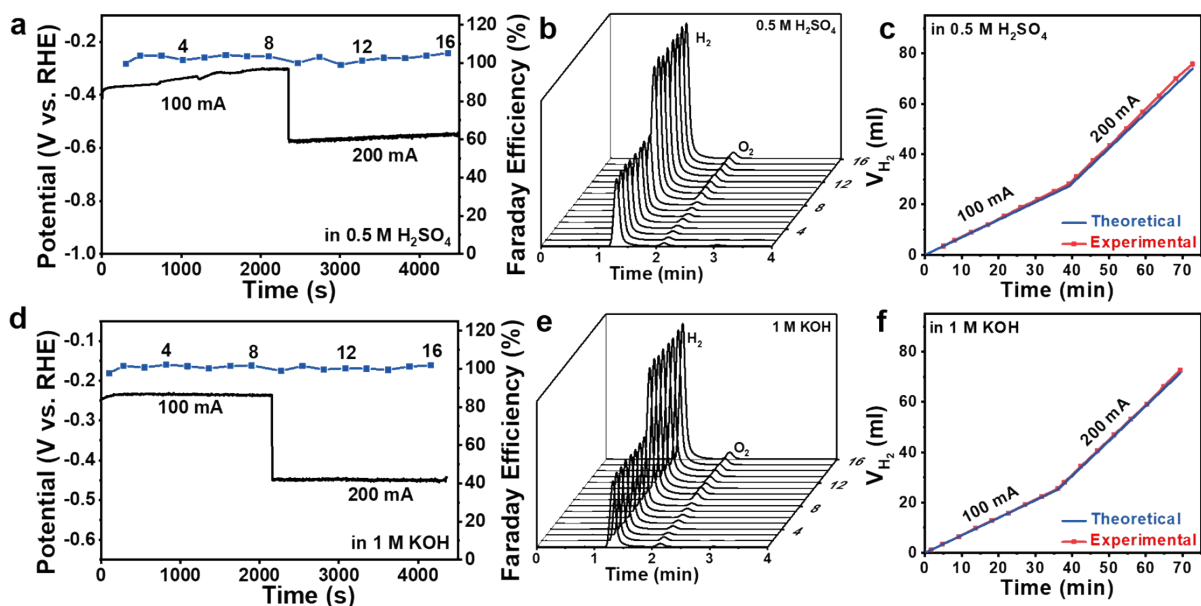

1  
 2 **Fig. S22.** (a, d) Faraday efficiencies, (b, e) GC spectra and (c, f) theoretical and experimental  
 3 data of Ni<sub>cluster</sub>-Ru NWs (loading on carbon paper, 1 cm<sup>2</sup>) in (a, b, c) 0.5 M H<sub>2</sub>SO<sub>4</sub> and (d, e,  
 4 f) 1 M KOH.

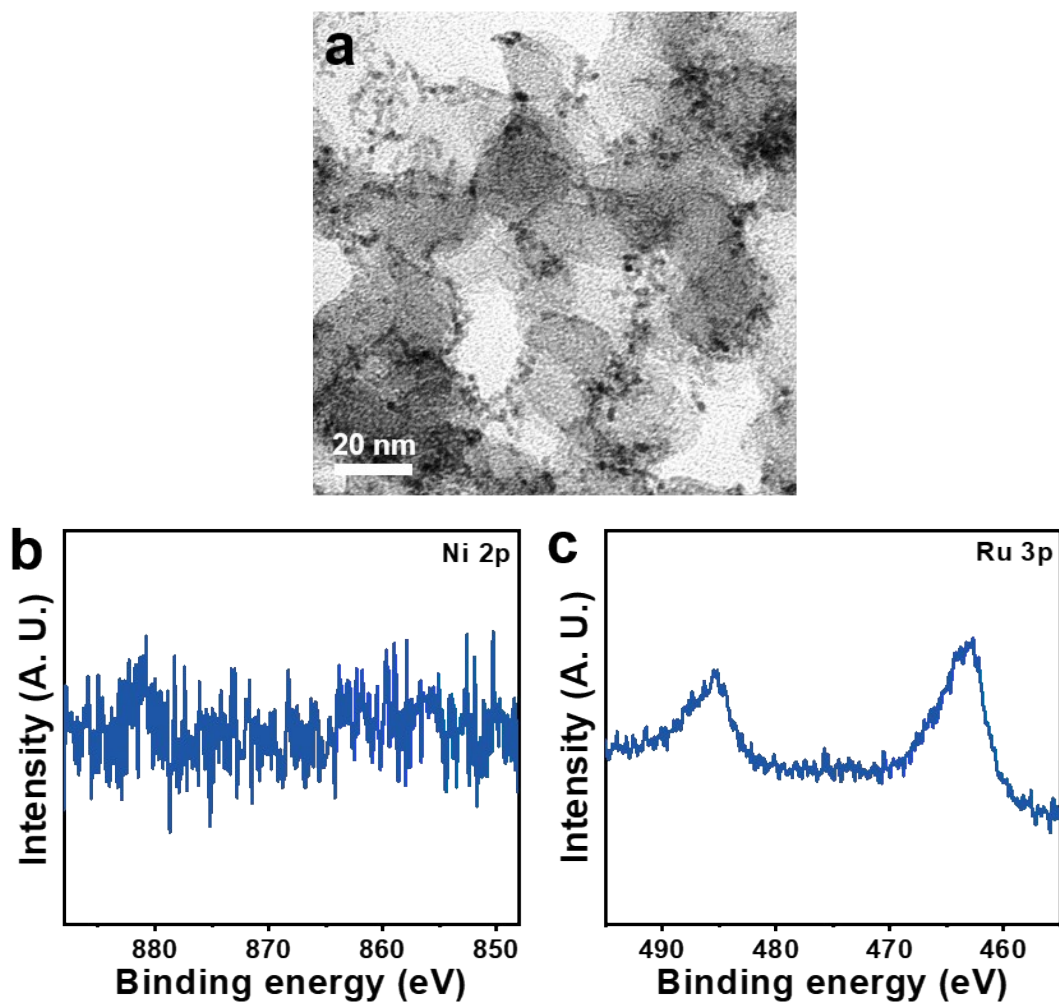

1

2 **Fig. S23.** (a) TEM image, (b) Ni 2p and (c) Ru 3p XPS spectra of Ni<sub>cluster</sub>-Ru NWs after  
3 stability tests.

4

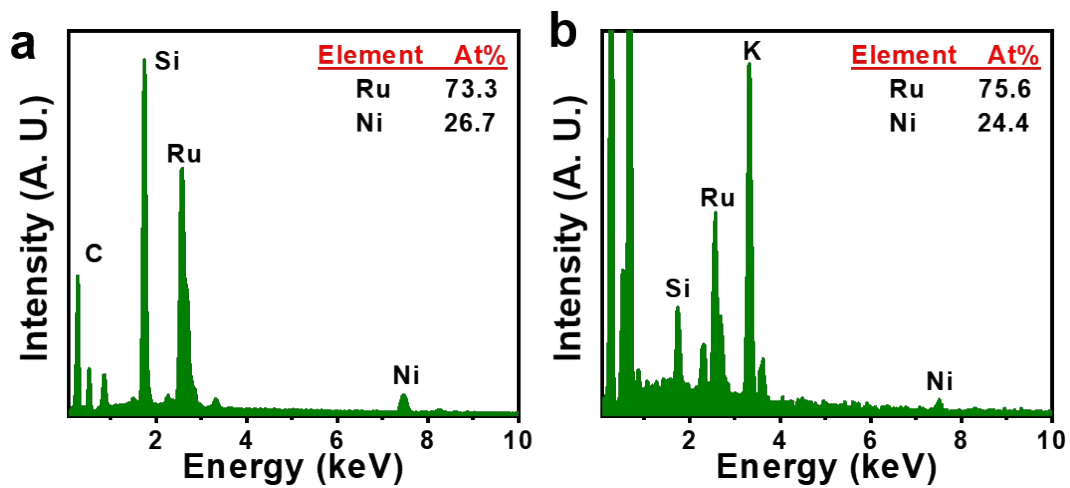

1

2 **Fig. S24.** EDS analyses of (a) as-prepared Ni-Ru NWs and (b) Ni-Ru NWs treated in 1 M  
 3 KOH for 12 h.

4

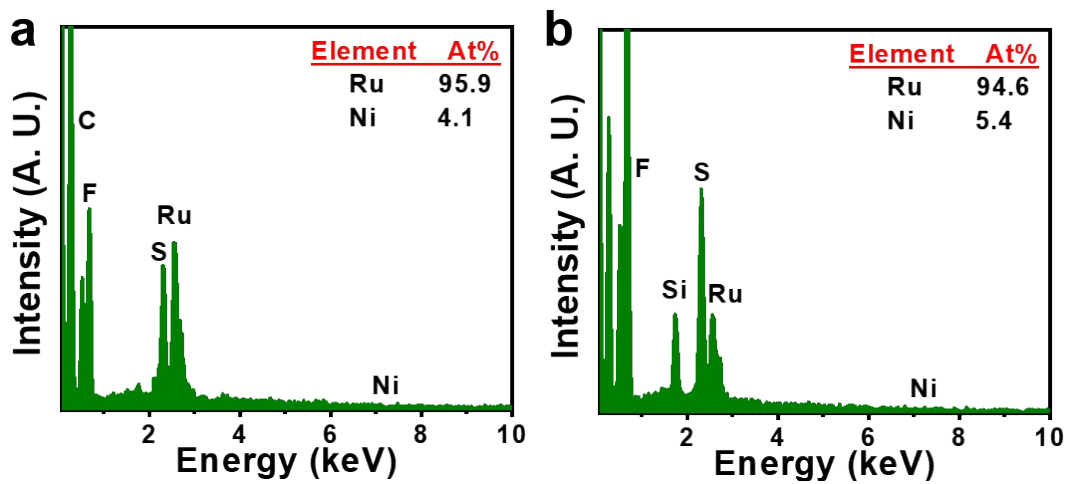

1

2 **Fig. S25.** EDS analyses of Ni<sub>cluster</sub>-Ru NWs after (a) HER and (b) OER tests in 0.5 M H<sub>2</sub>SO<sub>4</sub>.

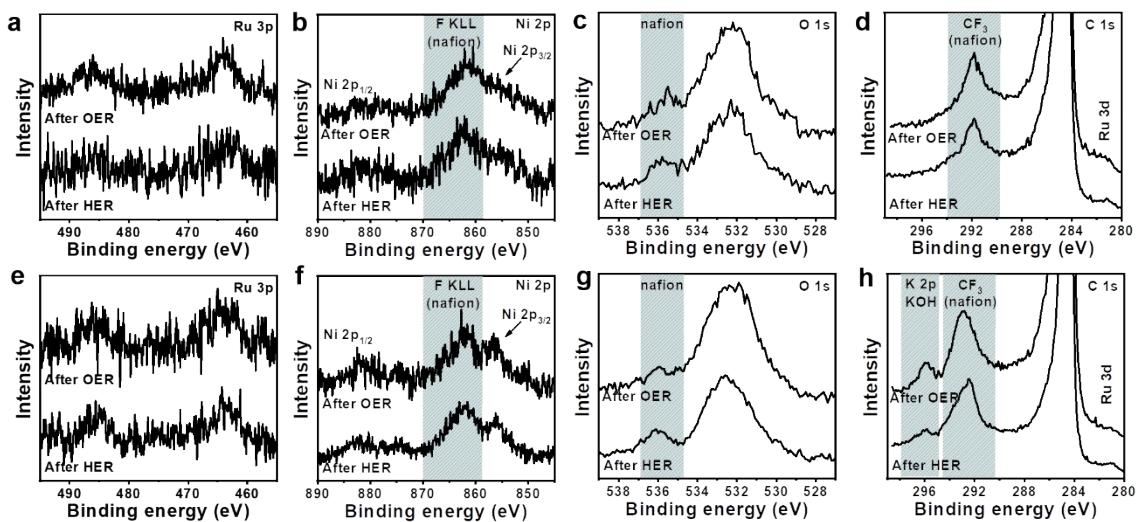

1

2 **Fig. S26.** (a, e) Ru 3p, (b, f) Ni 2p, (c, g) O 1s and (d, h) C 1s XPS spectra of Ni<sub>cluster</sub>-Ru  
 3 NWs after stability tests in (a, b, c, d) 0.5 M H<sub>2</sub>SO<sub>4</sub> and (e, f, g, h) 1 M KOH.

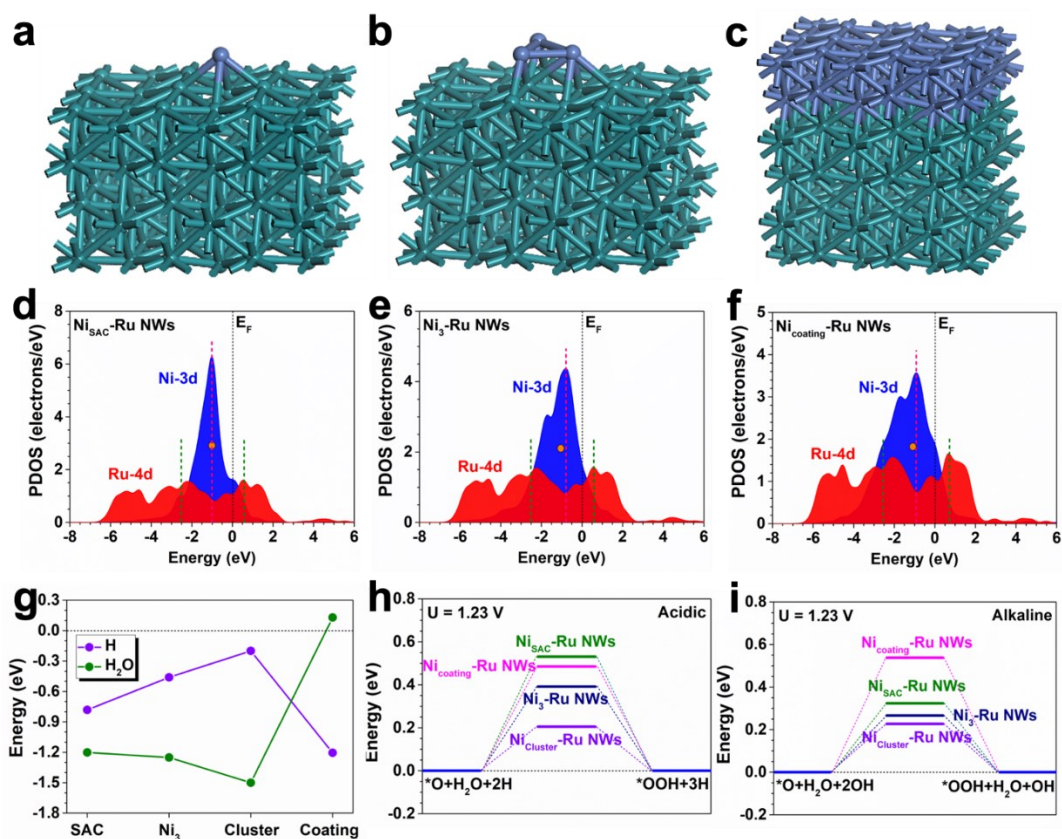

1

2 **Fig. S27.** The structural configurations with different size Ni cluster (a)  $\text{Ni}_{\text{SAC}}$ -Ru NWs, (b)  
 3  $\text{Ni}_3$ -Ru NWs and (c)  $\text{Ni}_{\text{Coating}}$ -Ru NWs. The PDOS of Ru NWs with different Ni cluster (d)  
 4  $\text{Ni}_{\text{SAC}}$ -Ru NWs, (e)  $\text{Ni}_3$ -Ru NWs and (f)  $\text{Ni}_{\text{Coating}}$ -Ru NWs. Orange circle represents the d-  
 5 band center of Ni-3d bands. (g) The adsorption energies of H and  $\text{H}_2\text{O}$  for  $\text{Ni}_{\text{SAC}}$ -Ru NWs,  
 6  $\text{Ni}_3$ -Ru NWs,  $\text{Ni}_{\text{cluster}}$ -Ru NWs and  $\text{Ni}_{\text{coating}}$ -Ru NWs. The overpotential of OER for  $\text{Ni}_{\text{SAC}}$ -Ru  
 7 NWs,  $\text{Ni}_3$ -Ru NWs,  $\text{Ni}_{\text{cluster}}$ -Ru NWs and  $\text{Ni}_{\text{coating}}$ -Ru NWs under (h) acidic media and (i)  
 8 alkaline media.

9

10 We have also carried out additional calculations on the varied size of the cluster to observe  
 11 the change of characteristics. As shown in **Fig. S27a-c**, we have constructed three different  
 12 material systems based on the size of the Ni nanocluster. For the Ni Single-atom catalysts  
 13 (SAC), the local structures of Ru NWs are barely affected. However, this structure will face  
 14 realistic synthesis issues during experiments since it is highly possible to form Ni atomically  
 15 doped Ru-NWs rather than Ni SAC supported by Ru NWs. As the cluster size further  
 16 increases, the structure of Ru NWs will be affected more evidently. The size influences on the  
 17 electronic structure are also noted in **Fig. S27d-f**. For the SAC Ni, the sharp 3d orbitals are  
 18 located near  $E_{\text{V}}-1.01$  eV. However, the interactions between Ni and Ru are limited, which  
 19 may lead to instability during electrocatalysis (**Fig. S27d**). As the nanocluster becomes larger,



1 the Ni-3*d* orbitals become much broader with lower electron density. The dominant peak of  
2 Ni-3*d* orbitals upshift slightly to  $E_V-0.75$  eV with improved electroactivity due to the stronger  
3 interactions with Ru-4*d* bands. Meanwhile, the pinning effect on Ni-3*d* bands is also noted in  
4 both Ni<sub>3</sub>-Ru NWs and Ni<sub>cluster</sub>-Ru NWs, which supports a much improved stability of Ni  
5 during the electrocatalysis (**Fig. S27e**). When the Ni cluster becomes too large and becomes  
6 the Ni coating, we notice that the dominant peak of Ni-3*d* bands downshifts to  $E_V-0.90$  eV,  
7 indicating a lower electroactivity. Meanwhile, as the Ni-3*d* becomes broader, the pinning  
8 effect by Ru NWs is also much weakened, leading to lower electroactivity and stability (**Fig.**  
9 **S27f**). Then, the adsorption energies also demonstrate the supportive results to the electronic  
10 structures. For HER in the acidic media, the optimal value of proton binding is noted in  
11 Ni<sub>cluster</sub>-Ru NWs, supporting the overbinding effect in other samples. Meanwhile, the  
12 strongest H<sub>2</sub>O binding energies further guarantee the efficient water dissociation of both HER  
13 and OER in the alkaline environment (**Fig. S27g**). As confirmed by **Fig. 6d-e**, the rate-  
14 determining step locates at the conversion from [\*O] to [\*OOH], which determines the  
15 overpotential of the OER. The overpotential shows that Ni<sub>cluster</sub>-Ru NWs display the lowest  
16 overpotential in both acidic and alkaline environments, which are consistent with the  
17 electronic structure and binding energies (**Fig. S27h-i**). Therefore, we have investigated the  
18 electroactivity of different size Ni cluster on Ru NWs, which further confirm that Ni<sub>cluster</sub>-Ru  
19 NWs is the optimal electrocatalyst from both electronic and energetic perspectives.

### 1 S3. Tables

2 **Table S1.** Structural parameters of Ni<sub>cluster</sub>-Ru NWs, NiO and Ni foil extracted from the EXAFS fitting ( $S_0^2 =$   
3 0.823).

| Sample                        | Scattering pair | CN          | R (Å)        | $\sigma^2$ ( $10^{-3}$ Å <sup>2</sup> ) | $\Delta E_0$ (eV) | R factor |
|-------------------------------|-----------------|-------------|--------------|-----------------------------------------|-------------------|----------|
| Ni <sub>cluster</sub> -Ru NWs | Ni-Ni/Ru        | 6.88 ± 1.52 | 2.49 ± 0.012 | 5.2 ± 1.5                               | 1.37 ± 1.5        | 0.0107   |
| NiO                           | Ni-Ni           | 12*         | 2.96 ± 0.009 | 6.1 ± 1.2                               | 7.48 ± 3.20       | 0.0103   |
|                               | Ni-O            | 6*          | 2.07 ± 0.022 | 5.1 ± 3.0                               | -3.25 ± 3.86      |          |
| Ni foil                       | Ni-Ni           | 12*         | 2.48 ± 0.007 | 6.0 ± 1.0                               | 6.83 ± 1.38       | 0.0158   |

4 **Note:**  $S_0^2$  is the amplitude reduction factor (obtained by the fitting of Ni foil and NiO bulk); CN is the  
5 coordination number; R is interatomic distance (the bond length between Ni central atoms and surrounding  
6 coordination atoms);  $\sigma^2$  is Debye-Waller factor (a measure of thermal and static disorder in absorber-scatterer  
7 distances);  $\Delta E_0$  is edge-energy shift (the difference between the zero kinetic energy value of the sample and that  
8 of the theoretical model); R factor is used to value the goodness of the fitting.

9 \*These values were fixed during the EXAFS fitting, based on the known structures of Ni metal and bulk NiO.

10

11 **Table S2.** The comparison of TOF values and mass activity performances of Ni<sub>cluster</sub>-Ru NWs and various  
12 reported HER electrocatalysts (at 10 mA cm<sup>-2</sup>).

| Electrocatalyst               | Electrolyte                          | TOF (H <sub>2</sub> s <sup>-1</sup> ) | Mass activity (A g <sup>-1</sup> <sub>Ru</sub> ) | Reference                           |
|-------------------------------|--------------------------------------|---------------------------------------|--------------------------------------------------|-------------------------------------|
| Ni <sub>cluster</sub> -Ru NWs | 1 M KOH                              | 8.95 (@ 50 mV)                        | 1417 (@ 50 mV)                                   | This work                           |
|                               | 0.5 M H <sub>2</sub> SO <sub>4</sub> | 4.58 (@ 50 mV)                        | 328.3 (@ 50 mV)                                  |                                     |
| Ru@C <sub>2</sub> N           | 1 M KOH                              | 1.66 (@ 50 mV)                        | 244.5 (@ 34.8 mV)                                | Nat. Nanotechnol. 2017, 12, 441-446 |
|                               | 0.5 M H <sub>2</sub> SO <sub>4</sub> | 1.95 (@ 50 mV)                        | 244.5 (@ 35.5 mV)                                |                                     |
| RuIrO <sub>x</sub>            | 1 M KOH                              | -                                     | 1000 (@ 13 mV)                                   | Nat. Commun. 2019, 10, 4875         |
|                               | 0.5 M H <sub>2</sub> SO <sub>4</sub> | -                                     | 1000 (@ 12 mV)                                   |                                     |
| Pt-Ni ASs                     | 1 M KOH                              | 18.63 (@ 50 mV)                       | 1764.7 (@ 53.8 mV)                               | Adv. Mater. 2018, 1801741           |
| Commercial Pt/C               | 1 M KOH                              | 1.62 (@ 50 mV)                        | 588.2 (@ 61.5 mV)                                | Adv. Mater. 2018, 1801741           |

13

1 **Table S3.** The comparison of TOF values and mass activity performances of Ni<sub>cluster</sub>-Ru NWs and various  
 2 reported OER electrocatalysts.

| Electrocatalyst               | Electrolyte                          | TOF (H <sub>2</sub> s <sup>-1</sup> ) | Mass activity (A g <sup>-1</sup> <sub>Ru</sub> ) | Reference                                                           |
|-------------------------------|--------------------------------------|---------------------------------------|--------------------------------------------------|---------------------------------------------------------------------|
| Ni <sub>cluster</sub> -Ru NWs | 1 M KOH                              | 1.645 (@ 250 mV)                      | 521.3 (@ 250 mV)                                 | This work                                                           |
|                               | 0.5 M H <sub>2</sub> SO <sub>4</sub> | 4.043 (@ 250 mV)                      | 593.2 (@ 250 mV)                                 |                                                                     |
| Amorphous Ir nanosheets       | 0.1 M HClO <sub>4</sub>              | 0.16 (@ 300 mV)                       | 221.8 (@ 300 mV)                                 | <i>Nat. Commun.</i> <b>2019</b> , <i>10</i> , 4855                  |
| Amorphous Li-IrO <sub>x</sub> | 0.5 M H <sub>2</sub> SO <sub>4</sub> | ~0.32 (@ 300 mV)                      | ~100 (@ 290 mV)                                  | <i>J. Am. Chem. Soc.</i> <b>2019</b> , <i>141</i> , 3014-3023       |
| IrO <sub>2</sub> /GCN         | 0.5 M H <sub>2</sub> SO <sub>4</sub> | ~0.07 (@ 320 mV)                      | 1280 (@ 370 mV)                                  | <i>Angew. Chem. Int. Ed.</i> <b>2019</b> , <i>131</i> , 12670-12674 |
| IrO <sub>x</sub> -Ir          | 0.5 M H <sub>2</sub> SO <sub>4</sub> | ~0.07 (@ 240 mV)                      | ~105 (@ 320 mV)                                  | <i>Angew. Chem. Int. Ed.</i> <b>2016</b> , <i>55</i> , 742-746      |

3  
 4 **Table S4.** The comparison of the HER, OER, and overall water splitting performances of Ni<sub>cluster</sub>-Ru NWs and  
 5 various reported bifunctional catalysts (at 10 mA cm<sup>-2</sup>).

| Catalyst                                         | Electrolyte                           | HER performance (mV) | OER performance (V)             | Water splitting (V) | References                                                       |
|--------------------------------------------------|---------------------------------------|----------------------|---------------------------------|---------------------|------------------------------------------------------------------|
| Ni <sub>cluster</sub> -Ru NWs                    | 0.5 M H <sub>2</sub> SO <sub>4</sub>  | 20                   | 1.435                           | 1.454               | This work                                                        |
|                                                  | 0.05 M H <sub>2</sub> SO <sub>4</sub> | 26                   | 1.437                           | 1.449               |                                                                  |
|                                                  | 0.1 M KOH                             | 19                   | 1.440                           | 1.454               |                                                                  |
|                                                  | 1 M KOH                               | 17                   | 1.424                           | 1.442               |                                                                  |
| a-RuTe <sub>2</sub> PNRs                         | 0.5 M H <sub>2</sub> SO <sub>4</sub>  | 33                   | 1.475                           | 1.52                | <i>Nat. Commun.</i> <b>2019</b> , <i>10</i> , 5692               |
|                                                  | 1 M KOH                               | 36                   | 1.515                           | -                   |                                                                  |
| RuIrO <sub>x</sub>                               | 0.5 M H <sub>2</sub> SO <sub>4</sub>  | 12                   | 1.463                           | 1.45                | <i>Nat. Commun.</i> <b>2019</b> , <i>10</i> , 4875               |
|                                                  | 1 M KOH                               | 13                   | 1.48                            | 1.47                |                                                                  |
| Ni-Fe NPs                                        | 1 M KOH                               | 46                   | 1.44                            | 1.47                | <i>Nat. Commun.</i> <b>2019</b> , <i>10</i> , 5599               |
| NiFe-MOF                                         | 0.1 M KOH                             | 134                  | 1.47                            | 1.55                | <i>Nat. Commun.</i> <b>2017</b> , <i>8</i> , 15341               |
| 2.5H-PHNCMs                                      | 1 M KOH                               | 70                   | 1.465                           | 1.44                | <i>Nat. Commun.</i> <b>2017</b> , <i>8</i> , 15377               |
| NiFeO <sub>x</sub> /CFP                          | 1 M KOH                               | 88                   | 1.51 (200 mA cm <sup>-2</sup> ) | 1.55                | <i>Nat. Commun.</i> <b>2015</b> , <i>6</i> 7261                  |
| CoP/NCNHP                                        | 1 M KOH                               | 115                  | 1.54                            | 1.64                | <i>J. Am. Chem. Soc.</i> <b>2018</b> , <i>140</i> , 2610-2618    |
| Co <sub>1</sub> Mn <sub>1</sub> CH/NF            | 1 M KOH                               | 180                  | 1.524 (30 mA cm <sup>-2</sup> ) | 1.68                | <i>J. Am. Chem. Soc.</i> <b>2017</b> , <i>139</i> , 8320-8328    |
| MoS <sub>2</sub> /Ni <sub>3</sub> S <sub>2</sub> | 1 M KOH                               | 110                  | 1.448                           | 1.56                | <i>Angew. Chem. Int. Ed.</i> <b>2016</b> , <i>55</i> , 6702-6707 |
| NiCo <sub>2</sub> O <sub>4</sub>                 | 1 M KOH                               | 110                  | 1.52                            | 1.65                | <i>Angew. Chem. Int. Ed.</i> <b>2016</b> , <i>55</i> , 6290-6294 |
| NiSe/NF                                          | 1 M KOH                               | 96                   | 1.5 (20 mA cm <sup>-2</sup> )   | 1.63                | <i>Angew. Chem. Int. Ed.</i> <b>2015</b> , <i>54</i> , 9351-9355 |
| h-PNRO/C                                         | 0.1 M HClO <sub>4</sub>               | 29.6                 | 1.469                           | 1.524               | <i>Adv. Mater.</i> <b>2019</b> , <i>31</i> , 1805546             |

|                                         |                                       |                                 |                                  |                                  |                                                                 |
|-----------------------------------------|---------------------------------------|---------------------------------|----------------------------------|----------------------------------|-----------------------------------------------------------------|
| Co-RuIr                                 | 0.1 M HClO <sub>4</sub>               | 14                              | 1.465                            | 1.52                             | <i>Adv. Mater.</i> <b>2019</b> , <i>31</i> , 1900510            |
| NiFeRu-LDH                              | 1 M KOH                               | 29                              | 1.455                            | 1.52                             | <i>Adv. Mater.</i> <b>2018</b> , <i>30</i> , 1706279            |
| IrCoNi/CFP                              | 0.1 M HClO <sub>4</sub>               | 33                              | 1.533                            | -                                | <i>Adv. Mater.</i> <b>2017</b> , <i>29</i> , 1703798            |
|                                         | 0.5 M H <sub>2</sub> SO <sub>4</sub>  | 68                              | 1.539                            | 1.56<br>(2 mA cm <sup>-2</sup> ) |                                                                 |
| Co-N <sub>x</sub>  P-GC/FEG             | 1 M KOH                               | 260                             | 1.55                             | 1.60                             | <i>Adv. Mater.</i> <b>2017</b> , <i>29</i> , 1604480            |
| NiFe LDH-NS@DG10                        | 1 M KOH                               | 300                             | 1.44                             | 1.5<br>(20 mA cm <sup>-2</sup> ) | <i>Adv. Mater.</i> <b>2017</b> , <i>29</i> , 1700017            |
|                                         | 0.05 M H <sub>2</sub> SO <sub>4</sub> | 96                              | 1.542                            | ~1.63                            |                                                                 |
|                                         | 0.1 M KOH                             | 119                             | 1.624                            | ~1.73                            |                                                                 |
|                                         | 1 M KOH                               | 39                              | 1.534                            | ~1.57                            |                                                                 |
| Porous MoO <sub>2</sub>                 | 1 M KOH                               | 27                              | 1.49                             | 1.53                             | <i>Adv. Mater.</i> <b>2016</b> , <i>28</i> , 3785-3790          |
| Ru NWs-Ir NWs                           | 1 M KOH                               | 38<br>(Ir NWs)                  | 1.454<br>(Ru NWs)                | 1.47                             | <i>Adv. Funct. Mater.</i> <b>2018</b> , <i>28</i> , 1803722     |
| Co/NBC-900                              | 1 M KOH                               | 117                             | 1.532                            | 1.68                             | <i>Adv. Funct. Mater.</i> <b>2018</b> , <i>28</i> , 1801136     |
| IrNi NCs                                | 0.5 M H <sub>2</sub> SO <sub>4</sub>  | 32<br>(20 mA cm <sup>-2</sup> ) | 1.55                             | 1.58                             | <i>Adv. Funct. Mater.</i> <b>2017</b> , <i>27</i> , 1700886     |
|                                         | 0.1 M HClO <sub>4</sub>               | 21<br>(20 mA cm <sup>-2</sup> ) | 1.51                             | -                                |                                                                 |
| Ni/NiP                                  | 1 M KOH                               | 130                             | 1.5<br>(30 mA cm <sup>-2</sup> ) | 1.61                             | <i>Adv. Funct. Mater.</i> <b>2016</b> , <i>26</i> , 3314-3323   |
| NiCo <sub>2</sub> S <sub>4</sub> NW/NF  | 1 M KOH                               | 210                             | 1.49                             | 1.63                             | <i>Adv. Funct. Mater.</i> <b>2016</b> , <i>26</i> , 4661-4672   |
| Ni <sub>0.51</sub> Co <sub>0.49</sub> P | 1 M KOH                               | 82                              | 1.469                            | 1.57                             | <i>Adv. Funct. Mater.</i> <b>2016</b> , <i>26</i> , 7644-7651   |
| Co <sub>3</sub> Se <sub>4</sub> /CF     | 1 M KOH                               | 179                             | -                                | 1.59                             | <i>Adv. Energy Mater.</i> <b>2017</b> , <i>7</i> , 1602579      |
| Ni-Co-P HNBS                            | 1 M KOH                               | 107                             | 1.50                             | 1.62                             | <i>Energy Environ. Sci.</i> <b>2018</b> , <i>11</i> , 872-880   |
| Cu@NiFe LDH                             | 1 M KOH                               | 116                             | 1.429                            | 1.54                             | <i>Energy Environ. Sci.</i> <b>2017</b> , <i>10</i> , 1820-1827 |
| Ru <sub>3</sub> Ni <sub>3</sub> NAs     | 0.5 M H <sub>2</sub> SO <sub>4</sub>  | 39                              | 1.482                            | 1.51                             | <i>iScience</i> <b>2019</b> , <i>11</i> , 492-504               |
|                                         | 0.05 M H <sub>2</sub> SO <sub>4</sub> | 96                              | 1.542                            | ~1.63                            |                                                                 |
|                                         | 0.1 M KOH                             | 119                             | 1.624                            | ~1.73                            |                                                                 |
|                                         | 1 M KOH                               | 39                              | 1.534                            | ~1.57                            |                                                                 |
| NC-CNT/CoP                              | 0.5 M H <sub>2</sub> SO <sub>4</sub>  | 62                              | 1.58                             | 1.66                             | <i>J. Mater. Chem. A</i> , <b>2018</b> , <i>6</i> , 9009-9018   |
|                                         | 1 M KOH                               | 120                             | 1.47                             | 1.63                             |                                                                 |
| NiAl <sub>3</sub> P/NF                  | 0.5 M H <sub>2</sub> SO <sub>4</sub>  | 35                              | 1.486                            | 1.52                             | <i>J. Mater. Chem. A</i> , <b>2018</b> , <i>6</i> , 9420-9427   |
|                                         | 1 M KOH                               | 80                              | 1.472                            | 1.55                             |                                                                 |
| IrW nanobranches                        | 0.1 M HClO <sub>4</sub>               | 16                              | 1.501                            | 1.58                             | <i>Nanoscale</i> , <b>2019</b> , <i>11</i> , 8898-8905          |
|                                         | 0.1 M KOH                             | 39                              | 1.521                            | 1.60                             |                                                                 |
| Ir WMWs                                 | 0.1 M HClO <sub>4</sub>               | 11.3                            | 1.513                            | 1.62                             | <i>Nanoscale</i> <b>2018</b> , <i>10</i> , 1892-1897            |
|                                         | 0.5 M HClO <sub>4</sub>               | 15.4                            | 1.50                             | -                                |                                                                 |

1 **Table S5.** EDS analyses of Ni<sub>cluster</sub>-Ru NWs and Ni-Ru NWs before and after electrochemical measurements in  
 2 different electrolytes.

| Samples                       | Initial (%) | In 0.5 M H <sub>2</sub> SO <sub>4</sub> (%) |            | In 1 M KOH (%) |            |
|-------------------------------|-------------|---------------------------------------------|------------|----------------|------------|
|                               |             | After HER                                   | After OER  | After HER      | After OER  |
| Ni-Ru NWs                     | 73.3 : 26.7 | -                                           | -          | -              | -          |
| Ni <sub>cluster</sub> -Ru NWs | 94.0 : 6.0  | 95.9 : 4.1                                  | 94.6 : 5.4 | 93.8 : 6.2     | 96.0 : 4.0 |

3

4 **Table S6.** Ni contents in Ni<sub>cluster</sub>-Ru NWs measured by ICP-OES after electrochemical measurements in different  
 5 electrolytes.

| Samples                       | Initial (%) | In 0.5 M H <sub>2</sub> SO <sub>4</sub> (%) |           | In 1 M KOH (%) |           |
|-------------------------------|-------------|---------------------------------------------|-----------|----------------|-----------|
|                               |             | After HER                                   | After OER | After HER      | After OER |
| Ni <sub>cluster</sub> -Ru NWs | 6.9         | 6.2                                         | 2.9       | 6.2            | 5.0       |

6

## 1 References

- 2 1. B. Ravel, M. Newville, *J Synchrotron Radiat* **2005**, *12*, 537-541.
- 3 2. M. Zhu, Q. Shao, Y. Qian, X. Huang, *Nano Energy* **2019**, *56*, 330-337.
- 4 3. J. Ding, Y. Zhou, Y. Li, S. Guo, X. Huang, *Chem. Mater.* **2016**, *28*, 2074-2080.
- 5 4. Q. Shao, Y. Wang, S. Yang, K. Lu, Y. Zhang, C. Tang, J. Song, Y. Feng, L. Xiong, Y.  
6 Peng, Y. Li, H. L. Xin, X. Huang, *ACS Nano* **2018**, *12*, 11625-11631.
- 7 5. I. A. Vladimir, F. Aryasetiawan, A. I. Lichtenstein, *J. Phys. Condens. Matter* **1997**, *9*,  
8 767.
- 9 6. S. J. Clark, M. D. Segall, C. J. Pickard, P. J. Hasnip, M. I. J. Probert, K. Refson, M. C.  
10 Payne, *zkri* **2005**, *220*, 567.
- 11 7. N. Marzari, D. Vanderbilt, M. C. Payne, *Phys. Rev. Lett.* **1997**, *79*, 1337-1340.
- 12 8. M. I. J. Probert, M. C. Payne, *Phys. Rev. B* **2003**, *67*, 075204.
- 13 9. L. Kleinman, D. M. Bylander, *Phys. Rev. Lett.* **1982**, *48*, 1425-1428.
- 14 10. S. G. Louie, S. Froyen, M. L. Cohen, *Phys. Rev. B* **1982**, *26*, 1738-1742.
- 15 11. I. Grinberg, N. J. Ramer, A. M. Rappe, *Phys. Rev. B* **2000**, *62*, 2311-2314.
- 16 12. A. M. Rappe, K. M. Rabe, E. Kaxiras, J. D. Joannopoulos, *Phys. Rev. B* **1990**, *41*, 1227-  
17 1230.
- 18 13. J. Mahmood, F. Li, S. M. Jung, M. S. Okyay, I. Ahmad, S. J. Kim, N. Park, H. Y. Jeong,  
19 J. B. Baek, *Nat. Nanotechnol.* **2017**, *12*, 441-446.
